# Supplementary material for: Somatic mutations and T-cell clonality in patients with immunodeficiency
Source: PubMed Central journal article supplement — Haematologica. 2019 Dec 19;105(12):2757–68. doi: 10.3324/haematol.2019.220889 (PMC7716374; doi:10.3324/haematol.2019.220889), 2019-12-19
Supplement: 2019_220889-Disclosures_Contributions.pdf [file 2019_220889-Disclosures_Contributions.pdf]

Haematologica  
HAEMATOL/2019/220889  
Version 3

Somatic mutations and T-cell clonality in patients with  
immunodeficiency

Paula Savola, Timi Martelius, Matti Kankainen, Jani Huuhtanen, Sofie Lundgren, Yrjö Koski, Samuli Eldfors, Tiina Kelkka, Mikko A.I. Keränen, Pekka Ellonen, Panu E. Kovanen, Soili Kytölä, Janna Saarela, Harri Lähdesmäki, Mikko R.J. Seppänen, and Satu Mustjoki

Disclosures: M.K. has served as consultant for Medix Biochemica (not related to this study). S.M. has received honoraria and research funding from Novartis, Pfizer and Bristol-Myers Squibb (not related to this study). J.S. has received lecture fees from Merck and Sanofi-Genzyme, and research funding from Sanofi-Genzyme (not related to this study). T.M. has received grants from Sanquin, lecture fees from MSD and CSL Behring, and travel grants from Octapharma, CSL Behring, Sanquin, Gilead, and MSD. Other authors state no conflicts of interest.

Contributions: P.S., S.M., M.R.J.S., and T.M. designed the study. P.S., T.M., S.M., M.R.J.S., P.E., T.K., M.A.I.K., H.L., J.H., J.S. and S.L. designed the experiments. T.M. and M.R.J.S. recruited the patients. P.S., P.K., S.K., T.K., J.S. and S.L. collected samples. P.S., Y.K., M.K., S.E., and J.H. analyzed the data. P.S. and S.M. wrote the manuscript. All authors contributed to writing and accepted the manuscript.
