# Supplementary material for: Somatic mutations and T-cell clonality in patients with immunodeficiency
Source: PubMed Central journal article supplement — Haematologica. 2019 Dec 19;105(12):2757–68. doi: 10.3324/haematol.2019.220889 (PMC7716374; doi:10.3324/haematol.2019.220889), 2019-12-19
Supplement: 2019_220889_SAVOLA_SUPPL.pdf [file 2019_220889_SAVOLA_SUPPL.pdf]

## Somatic mutations and T-cell clonality in patients with immunodeficiency

Paula Savola,<sup>1,2</sup> Timi Martelius,<sup>3</sup> Matti Kankainen,<sup>1,2,4,5</sup> Jani Huuhtanen,<sup>1,2</sup> Sofie Lundgren,<sup>1,2</sup> Yrjö Koski,<sup>1,2</sup> Samuli Eldfors,<sup>4</sup> Tiina Kelkka,<sup>1,2</sup> Mikko A.I. Keränen,<sup>1,2</sup> Pekka Ellonen,<sup>4</sup> Panu E. Kovanen,<sup>6</sup> Soili Kytölä,<sup>7</sup> Janna Saarela,<sup>4</sup> Harri Lähdesmäki,<sup>8</sup> Mikko R.J. Seppänen<sup>2,3,9</sup> and Satu Mustjoki<sup>1,2,10</sup>

<sup>1</sup>Hematology Research Unit Helsinki, University of Helsinki and Department of Hematology, HUS Helsinki University Hospital Comprehensive Cancer Center, Helsinki; <sup>2</sup>Translational Immunology Research Program, University of Helsinki, Helsinki; <sup>3</sup>Adult Immunodeficiency Unit, Infectious Diseases, Inflammation Center, University of Helsinki, HUS Helsinki University Hospital, Helsinki; <sup>4</sup>Institute for Molecular Medicine Finland (FIMM), HILIFE, University of Helsinki, Helsinki; <sup>5</sup>Medical and Clinical Genetics, University of Helsinki and HUS Helsinki University Hospital, Helsinki; <sup>6</sup>Department of Pathology, University of Helsinki and HUSLAB, HUS Helsinki University Hospital, Helsinki; <sup>7</sup>Laboratory of Genetics, HUSLAB, HUS Helsinki University Hospital, Helsinki; <sup>8</sup>Department of Computer Science, Aalto University School of Science, Espoo; <sup>9</sup>Rare Diseases Center and Pediatric Research Center, Children and Adolescents, University of Helsinki and HUS Helsinki University Hospital, Helsinki and <sup>10</sup>Department of Clinical Chemistry and Hematology, University of Helsinki, Helsinki, Finland

©2020 Ferrata Storti Foundation. This is an open-access paper. doi:10.3324/haematol.2019.220889

Received: March 14, 2019.

Accepted: December 18, 2019.

Pre-published: December 19, 2019.

Correspondence: SATU MUSTJOKI - satu.mustjoki@helsinki.fi

---

## Supplementary information

### **Somatic mutations and T-cell clonality in patients with immunodeficiency**

Paula Savola<sup>1,2</sup>, Timi Martelius<sup>3</sup>, Matti Kankainen<sup>1,2,4,5</sup>, Jani Huuhtanen<sup>1,2</sup>, Sofie Lundgren<sup>1,2</sup>, Yrjö Koski<sup>1,2</sup>, Samuli Eldfors<sup>4</sup>, Tiina Kelkka<sup>1,2</sup>, Mikko A.I. Keränen<sup>1,2</sup>, Pekka Ellonen<sup>4</sup>, Panu E. Kovanen<sup>6</sup>, Soili Kytölä<sup>7</sup>, Janna Saarela<sup>4</sup>, Harri Lähdesmäki<sup>8</sup>, Mikko R.J. Seppänen<sup>2,3,9</sup>, and Satu Mustjoki<sup>1,2,10</sup>

<sup>1</sup>Hematology Research Unit Helsinki, University of Helsinki and Department of Hematology, HUS Helsinki University Hospital Comprehensive Cancer Center, Helsinki, Finland; <sup>2</sup>Translational Immunology Research Program, University of Helsinki, Helsinki, Finland; <sup>3</sup>Adult Immunodeficiency Unit, Infectious Diseases, Inflammation Center, University of Helsinki, HUS Helsinki University Hospital, Helsinki, Finland; <sup>4</sup>Institute for Molecular Medicine Finland (FIMM), HILIFE, University of Helsinki, Helsinki, Finland; <sup>5</sup>Medical and Clinical Genetics, University of Helsinki and HUS Helsinki University Hospital, Helsinki, Finland; <sup>6</sup>Department of Pathology, University of Helsinki and HUSLAB, HUS Helsinki University Hospital, Helsinki, Finland; <sup>7</sup>Laboratory of Genetics, HUSLAB, HUS Helsinki University Hospital, Helsinki, Finland; <sup>8</sup>Department of Computer Science, Aalto University School of Science, Finland; <sup>9</sup>Rare Diseases Center and Pediatric Research Center, Children and Adolescents, University of Helsinki and HUS Helsinki University Hospital, Helsinki, Finland; <sup>10</sup>Department of Clinical Chemistry and Hematology, University of Helsinki, Helsinki, Finland

## Supplementary Methods

### Patients

We recruited 8 patients with late-onset CVID and 9 patients with other types of delayed-onset immunodeficiency or severe autoimmunity from the Helsinki University Hospital infectious disease clinic (Table 1). CVID patients were included in a previously described CVID cohort.<sup>1</sup> As healthy controls, we used blood donor buffy coat samples from the Red Cross Blood Service (Supplementary Table S1). This study was approved by local Ethics Committee, and the principles of Helsinki Declaration were followed. All patients signed informed consent.

Clinical manifestations of five patient cases have been previously described: patient 17 with biallelic germline mutation in *ADA2* gene (*CECRI*, p.Arg169Gln/p.Arg169Gln) and ADA2 deficiency,<sup>2</sup> patients 9-11 as germline gain-of-function mutations in *STAT3*,<sup>3</sup> and patient 12 as a case with compound immunodeficiency and 11q terminal deletion arr11q24.2q25 (126,074,297-134,927,114) x 1 (Jacobsen syndrome).<sup>4</sup>

### Sample preparation

Peripheral-blood EDTA samples were obtained from all patients. For patient 9, only archived bone-marrow mononuclear cells were available. Mononuclear cells were enriched from peripheral blood via Ficoll gradient centrifugation (Ficoll-Paque PLUS, GE Healthcare). CD4<sup>+</sup> and CD8<sup>+</sup> cells were purified via positive selection with magnetic beads (Miltenyi Biotec). Purity of sorted cells was controlled with flow cytometry with anti-CD45 (2D1, PerCP), anti-CD3 (SK7, FITC), anti-CD4 (SK3, APC), and anti-CD8 antibodies (SK1, PE-Cy7) (Beckton Dickinson). DNA was extracted with NucleSpin Tissue kit (Machery Nagel) according to manufacturer's instructions; however, the samples of patient 15 were extracted with Qiagen DNEasy Blood & Tissue kit (Qiagen). B-cell phenotypes were analyzed with flow cytometry in a clinical laboratory according to published guidelines.<sup>5,6</sup>

### T-cell receptor beta locus sequencing

*TCRB* sequencing was performed from CD8<sup>+</sup> and CD4<sup>+</sup> cells with the human *TCRB* immunoSEQ kit (Adaptive Biotechnologies) according to manufacturer's instructions.<sup>7,8</sup> The *TCRB* sequencing procedures have been described previously.<sup>8,9</sup> Healthy controls' CD4<sup>+</sup> and CD8<sup>+</sup> cells were also sequenced (n=27), and results were compared with the results of 7 CVID patients (pt.1-7). Only productive TCR sequences were taken into account in the analyses. ImmunoSEQ Analyzer software

(Adaptive Biotechnologies) and R version 3.4.2 and RStudio (version 1.1.383) were used for data analyses. The clonality metric was calculated as one minus Shannon entropy normalized by the logarithm of the number of productive TCR sequences.

To search for public TCR sequences, such as public pathogen-specific TCRs, we queried our TCR sequencing dataset on public TCRs that were included in the manually curated McPAS database, which includes approximately 9500 human TCR sequences.<sup>10</sup> For pathogen- and cancer-associated TCRs, only antigen-specific TCRs were queried (labels “1” and “2” in the McPAS database), but for autoimmune TCRs, all autoimmune-associated TCRs were included in the analyses. The pathogen-specific public TCRs comprised of TCRs targeting CMV, EBV, influenza, HIV, yellow fever virus, *Mycobacterium tuberculosis*, Herpes simplex 2 virus, and hepatitis C virus.

Physico-chemical similarities between TCRs were analyzed with a generic string kernel (GSKernel) algorithm,<sup>11</sup> which is designed for analysis of small peptides. The unsupervised clustering analysis of the TCR similarities was done with graph-theory based PhenoGraph.<sup>12</sup> The results were visualized with t-Distributed Stochastic Neighbor Embedding (t-SNE).<sup>13</sup> To focus on the most biologically meaningful TCRs and to minimize the amount of noise, we included only a subset of TCRs for the analyses:

1. Convergent TCRs that have more than 5 different clones OR convergent TCRs that make up at least 1% of the repertoire (“highly convergent”)
2. TCR clones that comprise at least 1% of all rearrangements (CD8+ cells) or 0.1% of all rearrangements (CD4+ cells) (“highly expanded”)

Also, these “highly convergent” and “expanded” clones were compared for their TCR amino-acid properties yielded by the “peptides” R package, which yields scores on the Cruciani *et al* properties (Polarity, Hydrophobicity, H-bonding),<sup>14</sup> GRAVY hydrophobicity index, and net charge.

### **Somatic variant detection: Sequencing library preparation**

To discover somatic variants that occur even at small variant allele frequencies, we designed a custom sequencing panel that comprised of the coding areas of 2533 genes, covering approximately 5.2 million base-pairs. The gene selection was based on the InnateDB database (<http://www.innatedb.ca/>),<sup>15-17</sup> but also other genes that were important in hematopoietic cells, adaptive immune responses, and autoimmunity were included (Supplementary Table S2). The target probes were designed with NimbleGen SeqCap EZ Developer system.

All immunodeficiency patient samples and 12/21 control samples were prepared for targeted sequencing with Kapa Hyper library preparation kit (Roche). Double-stranded genomic DNA (300-500ng) was fragmented with Covaris E220 evolution instrument (Covaris) to retrieve mean fragment size of 200 base-pairs. Sample libraries and enrichment were performed according to SeqCapEZ HyperCap Workflow User's Guide version 1.0 (Roche Nimblegen). SeqCap adapters and 9 cycles were used for pre-capture amplification. Four samples were multiplexed for capture using 1 ug of each library. Post-capture amplification included 10 cycles. Libraries were quantified with 2100 Bioanalyzer High Sensitivity Kit (Agilent Technologies).

For 9/21 control samples, ThruPLEX DNA-seq library preparation kit (Rubicon Genomics) was used. Double-stranded genomic DNA (100ng) was fragmented with Episonic Multi-Functional Bioprocessor 1100 (Epigenetik Group Inc.) to retrieve mean fragment size of 200 base-pairs. Sequencing libraries were prepared according to ThruPLEX DNA-seq library preparation kit protocol (Rubicon Genomics) with five amplification cycles. Libraries were quantified with LabChip GX (Caliper Life Sciences, Inc.). Eight samples (100ng DNA each) were pooled for hybridization and target capture, and targets were captured according to "Exome Capture of ThruPLEX Libraries with Roche NimbleGen SeqCap EZ Library" (Rubicon Genomics) and "NimbleGen SeqCap EZ Exome Library SR User's Guide" (Roche). Post-capture amplification was performed with 10 cycles. Quantification for sequencing was performed with 2100 Bioanalyzer High Sensitivity Kit (Agilent Technologies). All samples were sequenced with HiSeq2500 (Illumina) with HiSeq high output mode using v4 kits (Illumina), using 101-length paired-end reads.

### **Somatic variant detection: Sequencing data analysis**

Genome variants were called using a previously established Genome Analysis Toolkit (GATK) protocol.<sup>18</sup> Briefly, sequencing data was pre-processed with the Trimmomatic software,<sup>19</sup> and aligned to the GRCh38 genome with BWA-MEM.<sup>20</sup> The Picard toolset was used to mark PCR duplicates. Base recalibration was then performed with GATK BaseRecalibrator.<sup>21</sup> GATK IndelRealigner was used for local realignment near indels, and GATK CalculateContamination was used to estimate cross-sample contaminations. Somatic variants were identified using the MuTect2 toolset with default settings, using a panel of normals based on data from the 21 healthy control samples.<sup>22</sup> Finally, levels of 8-oxoguanine and deamination artifacts were estimated and variant calls resulting from sequencing artifacts filtered. Calling of variants relied on GATK version

3 tools and GATK resource files that were converted from GRCh37 to GRCh38 using CrossMap<sup>23</sup> and Ensembl chain files downloaded from Ensembl. GATK version 4 tools were used to estimate levels sequencing artifacts and cross-sample contamination.

Filtering and annotation of variant calls was based on in-house scripts and Annovar.<sup>24</sup> Briefly, variant calls passing standard MuTect2 filters and with a quality of  $\geq 40$ , read depth of  $\geq 7$ ,  $\geq 1$  forward and reverse strand read, and strand orientation bias (SOR) of  $\leq 3$  for single-nucleotide alterations or  $\leq 1$  for indel alterations were accepted. False-positive variant calls were then further filtered by removing calls with a variant allele frequency (VAF) of  $\leq 1\%$ , calls with a VAF of 1-2% and supported by  $\leq 5$  Catalogue of Somatic Mutations in Cancer (COSMIC) hematopoietic tissue samples, and calls that were associated with a population frequency  $> 1\%$  in gnomAD exome ALL, gnomAD exome FIN, gnomAD exome NFE, esp6500, or 1000g collections. Intronic and inframe variant calls were also removed. For all downstream analyses except mutational signature analyses, only nonsynonymous and splice-site mutations were included. Finally, nonsynonymous and splice-site variants were inspected visually with Integrative Genomics Viewer (IGV) to ensure high quality of variants.

Somatic variants specific for CD4+ and CD8+ fractions were identified by performing a tumor-normal MuTect2 analysis between datasets in both directions. This procedure eliminates germline-derived variants. Variants that originate from hematopoietic progenitors (clonal hematopoiesis) and occurring in both CD4+ and CD8+ cells were in turn identified using MuTect2 tumor-only strategy and by searching for somatic calls mutually present in both fractions. To avoid false findings among these “clonal hematopoiesis -associated” variant calls, only variant calls associated with known clonal hematopoiesis -associated genes<sup>25-27</sup> and with a VAF of  $\geq 2\%$  in at least one fraction were accepted. Variants were also quality checked using IGV and indel calls were not allowed to be within 5 base-pairs of a homopolymer or repeat region.

Signaling pathways were annotated using the Reactome public database,<sup>28</sup> and gene functions were annotated using Gene Ontology (GO) Consortium database “biological process” terms (Supplementary Table S3).<sup>29,30</sup> Mutational signatures were identified from both non-coding mutations and mutations that alter protein amino-acid sequence with deconstructSigs with default parameters and cancer profiles downloaded from the COSMIC web site in 09/2017.<sup>31,32</sup> The variant filtering criteria for signature analyses were 2% VAF, at least 7 supporting reads, and variant calls in both reverse and forward strands.

## Flow-cytometry-mediated cell sorting

We performed cell sorting to extract multiple, pure cell fractions from four patient samples (patients 2, 13, 16, 17). Patients' mononuclear cells were stained with the following antibodies: CD3-APC (SK7), CD8-FITC (SK1), CD4-BV510 (SK3), CD19-APC-Cy7 (SJ25C1), CD56-AF700 (B159), CD16-PE (Leu11c), CD14-PerCP-Cy5.5 (M5E2). They were sorted into CD3+CD4+, CD3+CD8+, CD3<sup>neg</sup>CD19+, CD3<sup>neg</sup>CD14+ and CD56+CD16+ cell fractions by FACS Influx (Beckton Dickinson). DNA was extracted by Qiagen DNEasy Blood & Tissue kit (Qiagen) according to manufacturer's instructions. DNA samples were prepared for Amplicon sequencing as described below. However, the yield of the fraction containing NK cells was so small that NK cells were not sequenced. The gating strategy is shown in the figure below. The purity of sorted fractions was controlled and was nearly 100%.

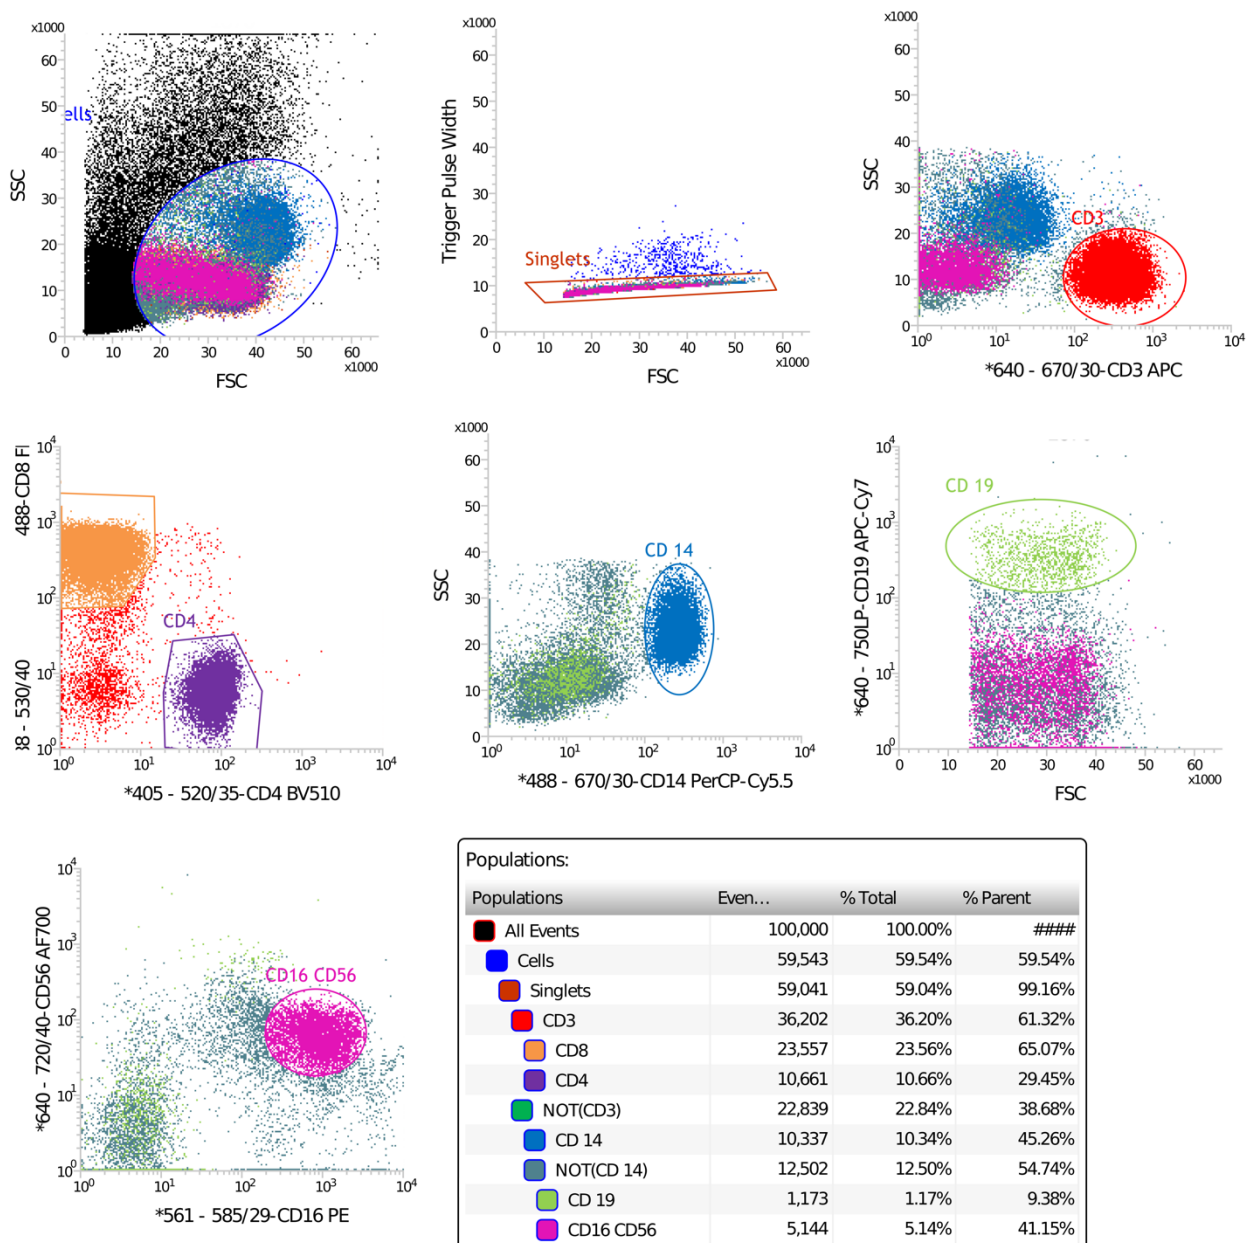

### **Amplicon sequencing: confirmation of mutations with a multiplex panel**

To gain higher confidence in the low VAF somatic mutations we performed a validation experiment by designing primers to cover genomic loci of 41 positions (Supplementary Table S9). Of these positions, 17 positions were negative controls. These 17 positions did not include any variants in the immunogene panel sequencing in our patient samples but had COSMIC identifiers. All positions were covered by amplicon primers that were multiplexed into a single reaction; the primers were designed by Paragon Genomics (Hayward, CA, USA) as a CleanPlex Custom NGS panel. Thus, all 41 positions were sequenced from all samples. Library preparation was performed according to manufacturer's instructions and the samples were sequenced with MiSeq PE150 v2 flow cell.

The sequencing data analysis pipeline has been described in detail previously.<sup>33</sup> Final variant refining included the following steps:

1. Discarding all variants with a frequency ratio less than 0.9
2. The variant must be first identified in the immunogene panel, as described in previous sections. Alternatively, it could be a control variant instead.
3. The variant should be supported by 10 or more reads. The VAFs of screened variants ranged from 0.017-0.13 in immunopanel data. Thus, a coverage of over 200-300 would be required to call variants in the positions with high confidence. Three amplicons had insufficient coverage (20-252x, Supplementary Table S9; *TET2* Q591fs, *DNMT3A* D531N, *JAK2* V617F) and were judged to be low confidence.

### **Additional Amplicon sequencing for *STAT5B* and *KRAS* mutations**

In addition to the multiplexed Amplicon panel sequencing, we performed single amplicon sequencing for three mutations: *STAT5B* N418K, *STAT5B* T628S and *KRAS* T58I. Samples for *STAT5B* sequencing were prepared by flow-cytometry-mediated cell sorting. PBMNCs were stained with CD3 (APC, SK7), CD4 (PerCP, SK3), CD8 (Pe-Cy7, SK1), CD14 (Pacific Blue, MHCD1428) antibodies and a Vbeta antibody corresponding to the largest CD8+ clone in the patient (IO Test Vbeta Mark Kit, Beckman Coulter, PE and FITC fluorochromes). Cells were sorted with FACSARIA II (Beckton Dickinson) into CD3+CD4+, CD3+CD8+Vbeta+, CD3+CD8+Vbeta<sup>neg</sup>, CD3<sup>neg</sup>CD14+ and CD3<sup>neg</sup>CD14<sup>neg</sup> cell fractions with nearly 100% purity. Afterwards, DNA extraction followed with the NucleSpin Tissue kit (Machery Nagel) according to manufacturer's instructions.



Short amplicons were designed to cover the mutation of interest. Amplicons were amplified with a two-step PCR protocol. The first PCR was performed in a volume of 20 $\mu$ l containing  $\leq$ 10ng of sample DNA, 10 $\mu$ l of 2 $\times$  Phusion High-Fidelity PCR Master Mix (Thermo Fisher Scientific, Waltham, MA, USA) and 0.25 $\mu$ M of each locus-specific primer. *KRAS* locus-specific primers were prone to forming primer dimers so 10 $\mu$ l of water was added to the ready PCR reaction to increase the volume to 30 $\mu$ l and the products were purified once with Agencourt AMPure XP beads (Beckman Coulter, Brea, CA, USA).

The second PCR was performed using the amplified product from step 1 and index primers. DNA Engine Tetrad 2 (Bio-Rad Laboratories) or G-Storm GS4 (Somerton) thermal cyclers were used to cycle both PCR steps. 27 cycles were used for the first PCR and 8 for the second (Index PCR). The amplified samples were pooled and the pool was purified with Agencourt AMPure XP beads twice using 0.8x volume of beads compared to the sample pool volume. Agilent 2100 Bioanalyzer (Agilent Genomics, Santa Clara, CA, USA) was used to quantify amplification performance and yield of the purified sample pools. Sample pools were sequenced with Illumina MiSeq System using Illumina MiSeq Reagent Kit v3 600 cycles kit (Illumina, San Diego, CA, USA).

### **RNA sequencing**

To study if genes with somatic mutations are expressed in CD4<sup>+</sup> or CD8<sup>+</sup> cells, we utilized RNA sequencing from healthy controls' CD4<sup>+</sup> cells (n=3) and CD8<sup>+</sup> cells (n=5). RNA was extracted with miRNeasy kit including DNase I digestion (Qiagen) or NucleoSpin RNA II kit (Machery-Nagel) according to manufacturer's instructions. Total RNA (1-3 $\mu$ g) of cells was depleted from ribosomal RNA (Ribo-Zero, Epicentre). Ribodepleted and purified RNA (Nucleospin cleanup XS, Machery-Nagel) was converted to ds cDNA with the SuperScript Double-Stranded cDNA Synthesis Kit (Life Technologies), in all but two CD4<sup>+</sup> samples, in which the NEBNext mRNA Library Prep Master Mix Set for Illumina was used. Random hexamers (New England BioLabs) were used to prime the first strand synthesis reaction and SPRI beads (Agencourt AMPure XP, Beckman Coulter) for cDNA purification. Illumina-compatible Nextera Technology (Illumina) was used for preparation of RNA sequencing libraries, but instead of DNA, ds cDNA (60ng) was used as a template. Following the tagmentation reaction, fragmented cDNA was purified with SPRI beads. To add Illumina-specific bridge-PCR sites and enrich the library, limited-cycle PCR (5 cycles) was done according to instructions of Nextera system with minor modifications. For barcoded libraries, 50 X Nextera Adaptor 2 was replaced with Nextera Bar Codes kit adapters (Illumina) in the PCR setup. SPRI beads were employed to purify the PCR products. Library quality was evaluated with

Agilent Bioanalyzer (Agilent Technologies). Libraries were sequenced with Illumina HiSeq2000 or Illumina Genome Analyzer II to produce 100 base-pair paired-end reads.

RNA sequencing data was processed and aligned as has been previously described.<sup>18</sup> Reads were first trimmed with Trimmomatic and then mapped to the human GRCh38 reference (Ensembl 82) using STAR with the default 2-pass per-sample mapping settings.<sup>34</sup> Reads sorting and duplicate marking was performed with the Picard toolkit. FastQC and RNA-SeQC were used for quality control analysis. Mapped reads were assigned to gene features (Ensembl v82) using FeatureCounts.<sup>35</sup> Multi-mapping reads and assignment of a read to more than one overlapping feature were allowed. Read counts were normalized with the Trimmed Mean of M-values (TMM) method with edgeR with default parameters,<sup>36</sup> and transformed to  $\log_2$  values for graphing.

### **Statistical analyses**

Variant calling procedures are described in the “Somatic variant detection” -section. Statistical analyses were performed using GraphPad Prism v.6 (GraphPad Software) and R version 3.4.2 ([www.r-project.org](http://www.r-project.org)). Data were inspected for normality both graphically and with Shapiro-Wilk tests, but due to small sample size and/or data skewing, mostly nonparametric statistical tests were employed. Statistical tests included Spearman correlation, t-test, Mann-Whitney test, Kruskal-Wallis test, and Dunn’s multiple comparisons tests. Benjamini-Hochberg correction for multiple testing was used when analyzing V-family and J-gene usage.

**Supplementary Tables.**

**Supplementary Table S1. Healthy controls used in the study.**

| Sample | Disease | Sex | Age | TCRB sequencing? | Immunogene panel sequencing? |
|--------|---------|-----|-----|------------------|------------------------------|
| HC1    | HC      | F   | 58  | yes              | yes                          |
| HC2    | HC      | M   | 58  | yes              | yes                          |
| HC13   | HC      | F   | 66  | yes              | yes                          |
| HC7    | HC      | M   | 48  | yes              | yes                          |
| HC8    | HC      | F   | 57  | yes              | yes                          |
| HC9    | HC      | F   | 56  | yes              | yes                          |
| HC10   | HC      | F   | 47  | yes              | yes                          |
| HC11   | HC      | M   | 48  | yes              | yes                          |
| HC12   | HC      | F   | 21  | yes              | yes                          |
| HC4    | HC      | F   | 44  | yes              | yes                          |
| HC5    | HC      | M   | 55  | yes              | yes                          |
| HC6    | HC      | M   | 52  | yes              | yes                          |
| HC3    | HC      | F   | 65  | yes              | yes                          |
| HC14   | HC      | F   | 63  | yes              | yes                          |
| HC15   | HC      | M   | 63  | yes              | yes                          |
| HC16   | HC      | F   | 65  | yes              | yes                          |
| HC17   | HC      | M   | 64  | yes              | yes                          |
| HC18   | HC      | F   | 65  | yes              | yes                          |
| HC19   | HC      | M   | 64  | yes              | yes                          |
| HC20   | HC      | F   | 63  | yes              | yes                          |
| HC21   | HC      | M   | 64  | no               | yes                          |
| HC22   | HC      | M   | 61  | yes              | no                           |
| HC23   | HC      | F   | 50  | yes              | no                           |
| HC27   | HC      | M   | 60  | yes              | no                           |
| HC28   | HC      | M   | 43  | yes              | no                           |
| HC26   | HC      | M   | 70  | yes              | no                           |
| HC24   | HC      | F   | 50  | yes              | no                           |
| HC25   | HC      | F   | 62  | yes              | no                           |

Healthy controls used in TCRB and immunogene panel sequencing. Both CD4+ and CD8+ cells were sequenced. The median age for controls in TCRB sequencing was 58 (interquartile range 50-64), and the mean 56.2 (95% confidence interval 52.2-60.3) The median age for controls immunogene panel was 58 (interquartile range 50-64) and the mean 56.5 (95% confidence interval 51.6-61.3).















|           |                 |                  |                 |         |                  |           |                 |
|-----------|-----------------|------------------|-----------------|---------|------------------|-----------|-----------------|
| CTSC      | ENSG00000109861 | MAPK1            | ENSG00000100030 | STIM1   | ENSG00000167323  | MPO       | ENSG00000005381 |
| CTSD      | ENSG00000117984 | MAPK10           | ENSG00000109339 | STK11   | ENSG00000118046  | MPZL3     | ENSG00000160588 |
| CTSF      | ENSG00000174080 | MAPK11           | ENSG00000185386 | STK3    | ENSG00000104375  | MR1       | ENSG00000153029 |
| CTSG      | ENSG00000100448 | MAPK12           | ENSG00000188130 | STK4    | ENSG00000101109  | TLR3      | ENSG00000164342 |
| CTSH      | ENSG00000103811 | MAPK13           | ENSG00000156711 | STMN1   | ENSG00000117632  | TLR4      | ENSG00000136869 |
| CTSK      | ENSG00000143387 | MAPK14           | ENSG00000112062 | STRADA  | ENSG00000266173  | TLR5      | ENSG00000187554 |
| CTSL      | ENSG00000135047 | MAPK3            | ENSG00000102882 | STUB1   | ENSG00000103266  | TLR6      | ENSG00000174130 |
| CTSO      | ENSG00000256043 | MAPK6            | ENSG00000069956 | STX11   | ENSG00000135604  | TLR7      | ENSG00000196664 |
| CTSS      | ENSG00000163131 | MAPK7            | ENSG00000166484 | STXBP2  | ENSG00000076944  | TLR8      | ENSG00000101916 |
| CTSV      | ENSG00000136943 | MAPK8            | ENSG00000107643 | SUCNR1  | ENSG00000198829  | TLR9      | ENSG00000239732 |
| CTSW      | ENSG00000172543 | MAPK8IP1         | ENSG00000121653 | SUGT1   | ENSG00000165416  | TMC6      | ENSG00000141524 |
| CTSZ      | ENSG00000101160 | MAPK8IP2         | ENSG00000008735 | SUOX    | ENSG00000139531  | TMC8      | ENSG00000167895 |
| CUL7      | ENSG00000044090 | MAPK8IP3         | ENSG00000138834 | SUZ12   | ENSG00000178691  | TMED7     | ENSG00000134970 |
| CUX1      | ENSG00000257923 | MAPK9            | ENSG00000050748 | SWAP70  | ENSG00000133789  | TMEM126A  | ENSG00000171202 |
| CX3CL1    | ENSG00000006210 | MAPKAPK2         | ENSG00000162889 | SYDE2   | ENSG00000097096  | TMEM173   | ENSG00000184584 |
| CX3CR1    | ENSG00000168329 | MAPKAPK3         | ENSG00000114738 | SYK     | ENSG00000165025  | TMEM220   | ENSG00000187824 |
| CXCL1     | ENSG00000163739 | MAPKAPK5         | ENSG00000089022 | SYNGR1  | ENSG00000100321  | TMEM30A   | ENSG00000112697 |
| CXCL10    | ENSG00000169245 | MAPT             | ENSG00000186868 | SYP     | ENSG00000102003  | TMIGD2    | ENSG00000167664 |
| CXCL11    | ENSG00000169248 | MARCH5           | ENSG00000198060 | TAB1    | ENSG00000100324  | TNF       | ENSG00000232810 |
| CXCL12    | ENSG00000107562 | MARCO            | ENSG00000019169 | TAB2    | ENSG00000055208  | TNFAIP3   | ENSG00000118503 |
| CXCL13    | ENSG00000156234 | MASP1            | ENSG00000127241 | TAB3    | ENSG00000157625  | TNFAIP8L2 | ENSG00000163154 |
| CXCL14    | ENSG00000145824 | MASP2            | ENSG00000009724 | TACR1   | ENSG00000115353  | TNFRSF10A | ENSG00000104689 |
| CXCL16    | ENSG00000161921 | MAVS             | ENSG00000088888 | TAGAP   | ENSG00000164691  | TNFRSF10B | ENSG00000120889 |
| CXCL2     | ENSG00000081041 | MAX              | ENSG00000125952 | TAL1    | ENSG00000162367  | TNFRSF10C | ENSG00000173535 |
| CXCL3     | ENSG00000163734 | MB21D1           | ENSG00000164430 | TANK    | ENSG00000136560  | TNFRSF10D | ENSG00000173530 |
| CXCL5     | ENSG00000163735 | MBL2             | ENSG00000165471 | TAOK1   | ENSG00000160551  | TNFRSF11A | ENSG00000141655 |
| CXCL6     | ENSG00000124875 | MBP              | ENSG00000197971 | TAOK2   | ENSG00000149930  | TNFRSF12A | ENSG00000006637 |
| CXCL9     | ENSG00000138755 | MBTPS1           | ENSG00000140943 | TAOK3   | ENSG00000135090  | TNFRSF13B | ENSG00000240505 |
| CXCR1     | ENSG00000163464 | MBTPS2           | ENSG00000012174 | TAP1    | ENSG00000168394  | TNFRSF13C | ENSG00000159958 |
| CXCR2     | ENSG00000180871 | MCAM             | ENSG00000076706 | TAP2    | ENSG00000204267  | TNFRSF14  | ENSG00000157873 |
| CXCR3     | ENSG00000186810 | MCL1             | ENSG00000143384 | TAPBP   | ENSG000000231925 | TNFRSF17  | ENSG00000048462 |
| CXCR4     | ENSG00000121966 | MCM10            | ENSG00000065328 | TAX1BP1 | ENSG00000106052  | TNFRSF18  | ENSG00000186891 |
| CXCR5     | ENSG00000160683 | MCM4             | ENSG00000104738 | TAZ     | ENSG00000102125  | TNFRSF1A  | ENSG00000067182 |
| CXCR6     | ENSG00000172215 | MDC1             | ENSG00000137337 | TBK1    | ENSG00000183735  | TNFRSF1B  | ENSG00000121837 |
| CYBA      | ENSG00000051523 | MDM2             | ENSG00000135679 | TBKBP1  | ENSG00000198933  | TNFRSF25  | ENSG00000215788 |
| CYBB      | ENSG00000165168 | MECOM            | ENSG00000085276 | TBL1XR1 | ENSG00000177565  | TNFRSF4   | ENSG00000186827 |
| CYCS      | ENSG00000172115 | MED1             | ENSG00000125686 | TBX1    | ENSG00000184058  | TNFRSF8   | ENSG00000120949 |
| CYLD      | ENSG00000083799 | MED12            | ENSG00000184634 | TBX21   | ENSG00000073861  | TNFRSF9   | ENSG00000049249 |
| CYP24A1   | ENSG00000019186 | MEF2B            | ENSG00000213999 | TCEB1   | ENSG00000154582  | TNFSF10   | ENSG00000121858 |
| CYSLTR1   | ENSG00000173198 | MEF2C            | ENSG00000081189 | TCEB2   | ENSG00000103363  | TNFSF11   | ENSG00000120659 |
| CYTIP     | ENSG00000115165 | MEFV             | ENSG00000103313 | TCF3    | ENSG00000071564  | TNFSF12   | ENSG00000239697 |
| CYTL1     | ENSG00000170891 | MERTK            | ENSG00000153208 | TCF4    | ENSG00000019628  | TNFSF13   | ENSG00000161955 |
| DAB2IP    | ENSG00000136848 | MFF              | ENSG00000168958 | TCF7    | ENSG00000081059  | TNFSF13B  | ENSG00000102524 |
| DAG1      | ENSG00000173402 | MFGE8            | ENSG00000140545 | TCIRG1  | ENSG00000110719  | TNFSF14   | ENSG00000125735 |
| DAGLB     | ENSG00000164535 | MFI2             | ENSG00000163975 | TCL1A   | ENSG00000100721  | TNFSF15   | ENSG00000181634 |
| DAPK1-IT1 | ENSG00000236709 | MFN1             | ENSG00000171109 | TCL1B   | ENSG00000213231  | TNFSF4    | ENSG00000117586 |
| DAXX      | ENSG00000204209 | MFN2             | ENSG00000116688 | TCN2    | ENSG00000185339  | TNFSF8    | ENSG00000106952 |
| DCD       | ENSG00000161634 | MICA             | ENSG00000204520 | TDP2    | ENSG00000111802  | TNFSF9    | ENSG00000125657 |
| DCHS1     | ENSG00000166341 | MICB             | ENSG00000204516 | TEC     | ENSG00000135605  | TNIP1     | ENSG00000145901 |
| DCLRE1C   | ENSG00000152457 | MID1             | ENSG00000101871 | TECPR1  | ENSG00000205356  |           |                 |
| DCN       | ENSG00000011465 | MID2             | ENSG00000080561 | TEK     | ENSG00000120156  |           |                 |
| DDAH1     | ENSG00000153904 | MIF              | ENSG00000240972 | TENM3   | ENSG00000218336  |           |                 |
| DDI1      | ENSG00000170967 | MINOS1-NBL1/NBL1 | ENSG00000158747 | TERC    | ENSG00000270141  |           |                 |
| DDIT3     | ENSG00000175197 | MIR107           | ENSG00000198997 | TERF1   | ENSG00000147601  |           |                 |
| DDIT4     | ENSG00000168209 | MIR10A           | ENSG00000274592 | TERF2   | ENSG00000132604  |           |                 |
| DDR1      | ENSG00000204580 | MIR10B           | ENSG00000207744 | TERT    | ENSG00000164362  |           |                 |
| DDX1      | ENSG00000079785 | MIR1204          | ENSG00000275264 | TET1    | ENSG00000138336  |           |                 |
| DDX21     | ENSG00000165732 | MIR1208          | ENSG00000221261 | TET2    | ENSG00000168769  |           |                 |
| DDX3X     | ENSG00000215301 | MIR122           | ENSG00000207778 | TEX41   | ENSG00000226674  |           |                 |
| DDX41     | ENSG00000183258 | MIR124-1         | ENSG00000275677 | TFAP2A  | ENSG00000137203  |           |                 |
| DDX58     | ENSG00000107201 | MIR125B1         | ENSG00000207971 | TFPI    | ENSG00000003436  |           |                 |
| DEFA1     | ENSG00000206047 | MIR125B2         | ENSG00000207863 | TFR2    | ENSG00000106327  |           |                 |
| DEFA3     | ENSG00000239839 | MIR126           | ENSG00000199161 | TFRC    | ENSG00000072274  |           |                 |
| DEFA4     | ENSG00000164821 | MIR1275          | ENSG00000221697 | TGFB1   | ENSG00000105329  |           |                 |
| DEFA5     | ENSG00000164816 | MIR132           | ENSG00000267200 | TGFB2   | ENSG00000092969  |           |                 |
| DEFA6     | ENSG00000164822 | MIR133A1         | ENSG00000276792 | TGFB3   | ENSG00000119699  |           |                 |
| DEFB1     | ENSG00000164825 | MIR135B          | ENSG00000199059 | TGFBI   | ENSG00000120708  |           |                 |
| DEFB103A  | ENSG00000176797 | MIR141           | ENSG00000207708 | TGFBR1  | ENSG00000106799  |           |                 |
| DEFB103B  | ENSG00000177243 | MIR145           | ENSG00000276365 | TGFBR2  | ENSG00000163513  |           |                 |
| DEFB105A  | ENSG00000186562 | MIR146A          | ENSG00000277727 | TGFBR3  | ENSG00000069702  |           |                 |
| DEFB106A  | ENSG00000186579 | MIR149           | ENSG00000207611 | TGM2    | ENSG00000198959  |           |                 |
| DEFB119   | ENSG00000180483 | MIR15B           | ENSG00000207779 | THBD    | ENSG00000178726  |           |                 |
| DEFB123   | ENSG00000180424 | MIR16-1          | ENSG00000208006 | THBS1   | ENSG00000137801  |           |                 |
| DEFB4A    | ENSG00000171711 | MIR16-2          | ENSG00000198987 | THPO    | ENSG00000090534  |           |                 |
| DHCR24    | ENSG00000116133 | MIR181A2         | ENSG00000207595 | THRB    | ENSG00000151090  |           |                 |
| DHX36     | ENSG00000174953 | MIR187           | ENSG00000207797 | THY1    | ENSG00000154096  |           |                 |
| DHX58     | ENSG00000108771 | MIR200C          | ENSG00000207713 | TIAM1   | ENSG00000156299  |           |                 |
| DHX9      | ENSG00000135829 | MIR208B          | ENSG00000215991 | TICAM1  | ENSG00000127666  |           |                 |
| DICER1    | ENSG00000100697 | MIR21            | ENSG00000199004 | TICAM2  | ENSG00000243414  |           |                 |
| DIDO1     | ENSG00000101191 | MIR212           | ENSG00000267195 | TIMMDC1 | ENSG00000113845  |           |                 |
| DIS3      | ENSG00000083520 | MIR223           | ENSG00000207939 | TIMP1   | ENSG00000102265  |           |                 |
| DKC1      | ENSG00000130826 | MIR23A           | ENSG00000207980 | TINF2   | ENSG00000092330  |           |                 |
| DKKL1     | ENSG00000104901 | MIR23B           | ENSG00000207563 | TIRAP   | ENSG00000150455  |           |                 |
| DLG1      | ENSG00000075711 | MIR302B          | ENSG00000274389 | TKTL2   | ENSG00000151005  |           |                 |
| DLK1      | ENSG00000185559 | MIR3148          | ENSG00000264788 | TLN1    | ENSG00000137076  |           |                 |
| DMBT1     | ENSG00000187908 | MIR372           | ENSG00000199095 | TLR1    | ENSG00000174125  |           |                 |
| DNM1L     | ENSG00000087470 | MIR373           | ENSG00000199143 | TLR10   | ENSG00000174123  |           |                 |
| DNMT3A    | ENSG00000119772 | MIR497           | ENSG00000273895 | TLR2    | ENSG00000137462  |           |                 |

Coding exons of listed genes were included in the custom sequencing panel. The table shows the genes and Ensembl Gene IDs for each sequenced gene.

**Supplementary Table S3. GO terms for gene annotations.**

| Lymphocyte functions |            | Cell proliferation |            | Inflammation |  |
|----------------------|------------|--------------------|------------|--------------|--|
| GO:0031295           | GO:2001185 | GO:0008283         | GO:0042104 | GO:0006925   |  |
| GO:0030217           | GO:2000456 | GO:0046316         | GO:0042130 | GO:0006954   |  |
| GO:0045058           | GO:2000457 | GO:0097325         | GO:0003249 | GO:1900225   |  |
| GO:0045066           | GO:2000452 | GO:1990705         | GO:2000090 | GO:1900227   |  |
| GO:0045065           | GO:2000451 | GO:0003263         | GO:1905938 | GO:1900226   |  |
| GO:0045062           | GO:2000450 | GO:0035988         | GO:1905937 | GO:1900016   |  |
| GO:0045061           | GO:2000449 | GO:0033687         | GO:0060502 | GO:1900015   |  |
| GO:0043029           | GO:2000329 | GO:0007405         | GO:0060916 | GO:1900017   |  |
| GO:0043316           | GO:2000330 | GO:0046651         | GO:0035739 | GO:0035492   |  |
| GO:0043379           | GO:2000570 | GO:0002941         | GO:0035736 | GO:0035491   |  |
| GO:0043368           | GO:2000555 | GO:0002158         | GO:0035740 | GO:0035490   |  |
| GO:0043383           | GO:2000554 | GO:0070661         | GO:0060722 | GO:0044546   |  |
| GO:0070489           | GO:2000553 | GO:0072574         | GO:0033091 | GO:0071646   |  |
| GO:0070231           | GO:2000552 | GO:0061517         | GO:0033083 | GO:0071647   |  |
| GO:0042093           | GO:2000556 | GO:0061516         | GO:0033080 | GO:0071648   |  |
| GO:0042098           | GO:2000551 | GO:0035172         | GO:0033087 | GO:0071642   |  |
| GO:0042110           | GO:2000566 | GO:0048144         | GO:1902462 | GO:0071640   |  |
| GO:0035709           | GO:2000565 | GO:0051450         | GO:1902460 | GO:0071641   |  |
| GO:0035704           | GO:2000564 | GO:0070341         | GO:1902461 | GO:0071607   |  |
| GO:0035683           | GO:2000563 | GO:0070343         | GO:0032945 | GO:0071608   |  |
| GO:0035685           | GO:2000562 | GO:0070342         | GO:0032946 | GO:0002861   |  |
| GO:0035684           | GO:2000561 | GO:0042100         | GO:0032817 | GO:0002862   |  |
| GO:0033079           | GO:2000515 | GO:0097360         | GO:0032818 | GO:0002863   |  |
| GO:0033078           | GO:2000514 | GO:0042098         | GO:0032819 | GO:0002864   |  |
| GO:0072678           | GO:2000519 | GO:0042127         | GO:0071863 | GO:0002865   |  |
| GO:0072683           | GO:2000518 | GO:0097166         | GO:0046646 | GO:0002866   |  |
| GO:0002870           | GO:2000516 | GO:0097168         | GO:0046640 | GO:0002874   |  |
| GO:0002572           | GO:2000321 | GO:1990654         | GO:1901383 | GO:0002875   |  |
| GO:0002517           | GO:2000328 | GO:1990739         | GO:1901382 | GO:0002876   |  |
| GO:0002456           | GO:2000320 | GO:1990863         | GO:1901384 | GO:0002877   |  |
| GO:0120117           | GO:0050862 | GO:1990922         | GO:0071338 | GO:0002878   |  |
| GO:0002360           | GO:0050860 | GO:0021534         | GO:0071336 | GO:0002879   |  |
| GO:0002369           | GO:0052156 | GO:0060720         | GO:0071337 | GO:0002880   |  |
| GO:0010818           | GO:0090721 | GO:0033079         | GO:0002053 | GO:0002881   |  |
| GO:0050798           | GO:0090717 | GO:0032943         | GO:0002322 | GO:0002882   |  |
| GO:0061485           | GO:0002291 | GO:0044565         | GO:0002309 | GO:0002673   |  |
| GO:0051132           | GO:2001188 | GO:0071425         | GO:0070667 | GO:0002674   |  |
| GO:0001913           | GO:2001189 | GO:0071335         | GO:0070668 | GO:0002675   |  |
| GO:0001866           | GO:2001190 | GO:0002174         | GO:0033599 | GO:0002676   |  |
| GO:0001865           | GO:0043369 | GO:0002176         | GO:0072301 | GO:0002677   |  |
| GO:0001777           | GO:0032829 | GO:0002358         | GO:0072203 | GO:0002678   |  |
| GO:1990656           | GO:0032830 | GO:0070662         | GO:0072201 | GO:0002523   |  |
| GO:0072735           | GO:0032831 | GO:0072343         | GO:0072198 | GO:0002525   |  |
| GO:0032292           | GO:0032832 | GO:0072137         | GO:0072126 | GO:0002526   |  |
| GO:0035398           | GO:0002841 | GO:0072135         | GO:0072124 | GO:0002527   |  |
| GO:0045059           | GO:0002842 | GO:0072122         | GO:0072125 | GO:0002528   |  |
| GO:0045064           | GO:0002852 | GO:0072123         | GO:0072111 | GO:0002532   |  |
| GO:0045063           | GO:0002853 | GO:0072110         | GO:0072575 | GO:0002533   |  |
| GO:0045068           | GO:0002854 | GO:0072089         | GO:1904935 | GO:0002534   |  |
| GO:0045067           | GO:0002571 | GO:0033278         | GO:1904934 | GO:0002535   |  |
| GO:0045060           | GO:0002362 | GO:0033002         | GO:1904933 | GO:0002536   |  |
| GO:0045580           | GO:0002302 | GO:0101023         | GO:1905315 | GO:0002537   |  |
| GO:0042129           | GO:0002294 | GO:0022034         | GO:1905564 | GO:0002538   |  |
| GO:0042492           | GO:0002298 | GO:0022022         | GO:1905563 | GO:0002539   |  |
| GO:0035707           | GO:1905400 | GO:0061518         | GO:1905562 | GO:0002540   |  |
| GO:0035712           | GO:1905404 | GO:0021928         | GO:0022019 | GO:0002541   |  |
| GO:0035711           | GO:1905403 | GO:0021929         | GO:1904699 | GO:0002544   |  |
| GO:0035706           | GO:1905402 | GO:0021926         | GO:1904698 | GO:0002545   |  |
| GO:0035705           | GO:1905401 | GO:0021846         | GO:0021992 | GO:0002437   |  |
| GO:0035699           | GO:1905399 | GO:0048659         | GO:0021923 | GO:0002438   |  |
| GO:0035688           | GO:2001191 | GO:0010463         | GO:0021931 | GO:0002439   |  |
| GO:0035687           | GO:2001192 | GO:0050798         | GO:0021924 | GO:0002441   |  |
| GO:0072736           | GO:2001193 | GO:0061485         | GO:0021936 | GO:0002442   |  |
| GO:0033077           | GO:2000454 | GO:0060038         | GO:2001109 | GO:0002349   |  |
| GO:1902482           | GO:2000453 | GO:0060011         | GO:2001110 | GO:0002351   |  |
| GO:1902483           | GO:0052295 | GO:0036093         | GO:2001111 | GO:0002391   |  |
| GO:0046630           | GO:0052085 | GO:0061351         | GO:1904441 | GO:0002393   |  |
| GO:0046629           | GO:0090719 | GO:0050674         | GO:2000793 | GO:0002232   |  |
| GO:0046633           | GO:0032834 | GO:0050673         | GO:2000648 | GO:0002246   |  |
| GO:0046631           | GO:0032833 | GO:0001935         | GO:2000647 | GO:0002247   |  |
| GO:0046632           | GO:0052280 | GO:0001866         | GO:1902033 | GO:0002248   |  |
| GO:0002770           | GO:0072679 | GO:0001834         | GO:1902034 | GO:0002269   |  |
| GO:0002680           | GO:0071594 | GO:0001787         | GO:1902035 | GO:1904597   |  |
| GO:0002667           | GO:0070242 | GO:0001777         | GO:2000179 | GO:1904596   |  |
| GO:0002512           | GO:0070243 | GO:0014009         | GO:2000178 | GO:1904598   |  |
| GO:0002458           | GO:0042092 | GO:0014010         | GO:2000177 | GO:0050727   |  |
| GO:0002364           | GO:0072680 | GO:0014856         | GO:2000103 | GO:0050729   |  |
| GO:0002295           | GO:0072681 | GO:0014855         | GO:2000102 | GO:0050728   |  |
| GO:0033371           | GO:0071610 | GO:0110021         | GO:2000101 | GO:0052259   |  |
| GO:0072539           | GO:2000412 | GO:0070444         | GO:2000256 | GO:0052256   |  |
| GO:2000407           | GO:2000411 | GO:0003264         | GO:2000255 | GO:0052260   |  |
| GO:2000404           | GO:2000410 | GO:003206          | GO:2000254 | GO:0052032   |  |
| GO:2000523           | GO:2000413 | GO:0048145         | GO:2000231 | GO:0052036   |  |
| GO:0010819           | GO:2000400 | GO:0010837         | GO:2000230 | GO:0052035   |  |
| GO:0050852           | GO:2000399 | GO:0090289         | GO:2000229 | GO:0060265   |  |
| GO:0050863           | GO:2000398 | GO:1904073         | GO:0048662 | GO:0060264   |  |
| GO:0061470           | GO:0098915 | GO:1904195         | GO:0048661 | GO:0060266   |  |
| GO:0001768           | GO:0002325 | GO:0030888         | GO:0048660 | GO:1904784   |  |
| GO:0036371           | GO:0031294 | GO:0070344         | GO:0010456 | GO:0090594   |  |
| GO:0046006           | GO:0043366 | GO:0042129         | GO:0010626 | GO:0106016   |  |
| GO:0046007           | GO:0002461 | GO:1990789         | GO:0010625 | GO:0106014   |  |
| GO:0046013           | GO:0002437 | GO:1990874         | GO:0061469 | GO:0106015   |  |
| GO:0046014           | GO:0050851 | GO:1905936         | GO:0060045 | GO:0006953   |  |
| GO:0006924           | GO:1905024 | GO:0035726         | GO:0060044 | GO:0031960   |  |
| GO:1903903           | GO:0019724 | GO:0060721         | GO:0060043 | GO:0006663   |  |
| GO:0045591           | GO:0097026 | GO:0032944         | GO:0060253 | GO:0030851   |  |
| GO:0045590           | GO:0002348 | GO:0044342         | GO:0060252 | GO:0018910   |  |
| GO:0045589           | GO:0002350 | GO:0071838         | GO:1904705 | GO:0043312   |  |
| GO:0045581           | GO:0071652 | GO:0046630         | GO:1904898 | GO:0070400   |  |
| GO:0045583           | GO:0071609 | GO:0046633         | GO:1904897 | GO:0097701   |  |
| GO:0045582           | GO:2000415 | GO:0002359         | GO:1904899 | GO:0042222   |  |
| GO:0045585           | GO:2000414 | GO:0070666         | GO:0061323 | GO:0097388   |  |
| GO:0045584           | GO:0036399 | GO:0033598         | GO:0061325 | GO:0042033   |  |
| GO:0045586           | GO:0050854 | GO:0072263         | GO:0061209 | GO:1990772   |  |
| GO:0043318           | GO:0001806 | GO:0072091         | GO:0050677 | GO:1990774   |  |

|            |            |            |            |            |
|------------|------------|------------|------------|------------|
| GO:0043317 | GO:0060307 | GO:0008284 | GO:0050676 | GO:0042533 |
| GO:0043319 | GO:1905026 | GO:0008285 | GO:0050679 | GO:0042534 |
| GO:0043374 | GO:1905025 | GO:0022018 | GO:0050680 | GO:0042535 |
| GO:0043367 | GO:0097048 | GO:0022012 | GO:0039015 | GO:0042536 |
| GO:0043381 | GO:0097029 | GO:0022013 | GO:0090095 | GO:0042537 |
| GO:0043380 | GO:0097028 | GO:0022020 | GO:0051141 | GO:0150076 |
| GO:0043382 | GO:0044565 | GO:0022021 | GO:0051142 | GO:0034651 |
| GO:0070238 | GO:0002473 | GO:1904697 | GO:0051140 | GO:0034650 |
| GO:0070233 | GO:0071649 | GO:0021930 | GO:0001938 | GO:0071644 |
| GO:0070232 | GO:0071653 | GO:0021925 | GO:0001937 | GO:0071645 |
| GO:0070234 | GO:0071654 | GO:0010464 | GO:0014011 | GO:0071643 |
| GO:0042102 | GO:0072615 | GO:0010624 | GO:0014842 | GO:0071606 |
| GO:0042103 | GO:0045222 | GO:0060251 | GO:0014859 | GO:0046469 |
| GO:0042104 | GO:0035781 | GO:0061270 | GO:0014858 | GO:0071385 |
| GO:0042130 | GO:0035780 | GO:0050675 | GO:0014857 | GO:0071384 |
| GO:0042722 | GO:0050858 | GO:0050678 | GO:0003420 | GO:0002558 |
| GO:0035710 | GO:0050857 | GO:0001936 | GO:0003265 | GO:0002559 |
| GO:0035739 | GO:1990922 | GO:0001833 | GO:0003266 | GO:0002524 |
| GO:0035745 | GO:0070266 | GO:0014841 | GO:0014844 | GO:0002432 |
| GO:0035744 | GO:0071650 | GO:0003419 | GO:1901723 | GO:0002445 |
| GO:0035740 | GO:0071651 | GO:1902731 | GO:1901722 | GO:0016068 |
| GO:0035783 | GO:0002460 | GO:1902732 | GO:1901724 | GO:0008211 |
| GO:0035697 | GO:1904837 | GO:0035207 | GO:1901963 | GO:0072538 |
| GO:1902232 | GO:1904863 | GO:0035208 | GO:1901964 | GO:1903492 |
| GO:0031153 | GO:0045210 | GO:0048146 | GO:0003250 | GO:0050752 |
| GO:0033090 | GO:0035724 | GO:0048147 | GO:0003251 | GO:0050751 |
| GO:0033091 | GO:0002569 | GO:0010839 | GO:0003252 | GO:0050754 |
| GO:0033082 | GO:0002432 | GO:0010838 | GO:0003295 | GO:0050753 |
| GO:0033083 | GO:0008626 | GO:0090290 | GO:2000092 | GO:0050756 |
| GO:0033080 | GO:0048538 | GO:0090291 | GO:2000091 | GO:0050755 |
| GO:0033081 | GO:0070244 | GO:1904002 | GO:0060501 | GO:0050701 |
| GO:0033086 | GO:0070245 | GO:1904003 | GO:0060505 | GO:0039573 |
| GO:0033087 | GO:1904865 | GO:1904004 | GO:0060517 | GO:0051468 |
| GO:0046646 | GO:1904864 | GO:1904075 | GO:0060768 | GO:0051384 |
| GO:0046643 | GO:0090737 | GO:1904074 | GO:0060767 | GO:0001812 |
| GO:0046640 | GO:0001771 | GO:1904196 | GO:0060782 | GO:0001811 |
| GO:0046634 | GO:0097720 | GO:1904197 | GO:0060781 | GO:0001810 |
| GO:0046637 | GO:0070236 | GO:0046006 | GO:0060784 | GO:0001809 |
| GO:0002849 | GO:0070239 | GO:0046007 | GO:0035742 | GO:0001808 |
| GO:0002709 | GO:0070240 | GO:0046013 | GO:0035741 | GO:0001807 |
| GO:0002710 | GO:0070241 | GO:0046014 | GO:0060750 | GO:0001806 |
| GO:0002711 | GO:0070235 | GO:0030889 | GO:0060723 | GO:0001805 |
| GO:0002724 | GO:0035397 | GO:0030890 | GO:0060650 | GO:0001804 |
| GO:0002725 | GO:0035399 | GO:0070347 | GO:0060664 | GO:0001803 |
| GO:0002726 | GO:0035743 | GO:0070346 | GO:0033601 | GO:0001802 |
| GO:0002664 | GO:0035742 | GO:0070349 | GO:0033600 | GO:0001801 |
| GO:0002665 | GO:0035741 | GO:0070348 | GO:0033092 | GO:0001800 |
| GO:0002666 | GO:0035698 | GO:0070350 | GO:0033084 | GO:0001799 |
| GO:0002668 | GO:1902233 | GO:0070352 | GO:0033088 | GO:0001798 |
| GO:0002669 | GO:1902234 | GO:0070351 | GO:1902723 | GO:0001797 |
| GO:0002568 | GO:0033092 | GO:0070345 | GO:1902724 | GO:0001796 |
| GO:0002457 | GO:0033084 | GO:0042102 | GO:1902833 | GO:0001795 |
| GO:0002411 | GO:0033085 | GO:0042103 | GO:1902832 | GO:0001794 |
| GO:0002363 | GO:0033088 | GO:2000080 | GO:0032820 |            |
| GO:0002365 | GO:0033089 | GO:0060504 | GO:0044340 |            |
| GO:0002304 | GO:0046647 | GO:0060770 | GO:0071864 |            |
| GO:0002309 | GO:0046644 | GO:0060769 | GO:0046647 |            |
| GO:0002286 | GO:0046645 | GO:0060651 | GO:0046648 |            |
| GO:0002292 | GO:0046648 | GO:0035604 | GO:0046642 |            |
| GO:0002296 | GO:0046642 | GO:1902727 | GO:0046641 |            |
| GO:0002297 | GO:0046641 | GO:1902728 | GO:0002043 |            |
| GO:0002299 | GO:0046635 | GO:0032821 | GO:0002310 |            |
| GO:0045623 | GO:0046636 | GO:0032822 | GO:0002311 |            |
| GO:0045624 | GO:0046639 | GO:0044343 | GO:0002324 |            |
| GO:0045622 | GO:0046638 | GO:1903588 | GO:0002289 |            |
| GO:0045628 | GO:0002840 | GO:1903589 | GO:0072042 |            |
| GO:0045625 | GO:0002846 | GO:1903587 | GO:0072302 |            |
| GO:0033374 | GO:0002847 | GO:0021922 | GO:0072303 |            |
| GO:0033375 | GO:0002848 | GO:0021939 | GO:0072200 |            |
| GO:0072540 | GO:0002850 | GO:0021938 | GO:0072261 |            |
| GO:2000455 | GO:0002851 | GO:0038091 | GO:0072262 |            |
| GO:2000409 | GO:0002681 | GO:0061324 | GO:0072199 |            |
| GO:2000408 | GO:0002625 | GO:0061315 | GO:0072138 |            |
| GO:2000406 | GO:0002626 | GO:0090256 | GO:0072136 |            |
| GO:2000405 | GO:0002627 | GO:0016559 | GO:0072090 |            |
| GO:2000176 | GO:0002403 | GO:0000266 | GO:1903769 |            |
| GO:2000175 | GO:0002419 | GO:0003267 | GO:1905474 |            |
| GO:2000174 | GO:0002424 | GO:0003268 | GO:1905044 |            |
| GO:2000569 | GO:0002310 | GO:0003269 | GO:1905046 |            |
| GO:2000568 | GO:0002311 | GO:0003270 | GO:1905045 |            |
| GO:2000567 | GO:0002361 | GO:0003271 | GO:1904692 |            |
| GO:2000517 | GO:0002300 | GO:0021937 | GO:1904691 |            |
| GO:2000525 | GO:0002301 | GO:0001832 | GO:0021921 |            |
| GO:2000524 | GO:0002303 | GO:0001547 | GO:0021940 |            |
| GO:2000319 | GO:0002305 | GO:0043029 | GO:0021941 |            |
| GO:0010820 | GO:0002306 | GO:0002262 | GO:2001013 |            |
| GO:0050868 | GO:0002307 | GO:0033023 | GO:1904442 |            |
| GO:0050870 | GO:0002308 | GO:0060248 | GO:1904443 |            |
| GO:0050856 | GO:0002287 | GO:0061382 | GO:2000795 |            |
| GO:0060370 | GO:0002288 | GO:0036145 | GO:2000794 |            |
| GO:0036037 | GO:0002289 | GO:0001782 | GO:2000792 |            |
| GO:0051141 | GO:0002290 | GO:0042637 | GO:2000791 |            |
| GO:0051142 | GO:0002293 | GO:0021847 | GO:2000790 |            |
| GO:0051140 | GO:0045630 | GO:0001550 | GO:2000729 |            |
| GO:0051138 | GO:0045629 | GO:0001545 | GO:2000607 |            |
| GO:0051136 | GO:0045627 | GO:1990079 | GO:2000606 |            |
| GO:0051137 | GO:0045626 | GO:0060250 | GO:2000608 |            |
| GO:0051134 | GO:0033378 | GO:0043366 | GO:2000137 |            |
| GO:0051135 | GO:0033379 | GO:0007446 | GO:2000136 |            |
| GO:0051133 | GO:0033376 | GO:0043930 | GO:2000138 |            |
| GO:0001916 | GO:0033377 | GO:0043929 | GO:2000566 |            |
| GO:0001915 | GO:0033380 | GO:0002467 | GO:2000565 |            |
| GO:0001914 | GO:0033381 | GO:0061519 | GO:2000564 |            |
| GO:0023022 | GO:0033382 | GO:0050701 | GO:2000563 |            |
| GO:0042088 | GO:1905398 | GO:0001895 | GO:2000562 |            |
| GO:0072538 | GO:1905397 | GO:0001894 | GO:2000561 |            |
| GO:1903904 | GO:2001186 | GO:0001544 | GO:2000497 |            |
| GO:1903905 | GO:2001187 | GO:0001922 | GO:2000496 |            |
| GO:1900281 |            | GO:0097327 | GO:2000495 |            |
| GO:1900280 |            | GO:0035986 | GO:0060054 |            |
| GO:1900279 |            | GO:0046697 | GO:0060244 |            |

|            |  |            |            |  |
|------------|--|------------|------------|--|
| GO:0045588 |  | GO:0002040 | GO:0061006 |  |
| GO:0045587 |  | GO:0060249 | GO:1904707 |  |
| GO:0043378 |  | GO:0061333 | GO:1904706 |  |
| GO:0043377 |  | GO:0001776 | GO:0061331 |  |
| GO:0043370 |  | GO:0002119 | GO:0061225 |  |
| GO:0043372 |  | GO:0061062 | GO:0061222 |  |
| GO:0043371 |  | GO:0061063 | GO:0061269 |  |
| GO:0043373 |  | GO:0061064 | GO:0090255 |  |
| GO:0043376 |  |            | GO:0090096 |  |
| GO:0043375 |  |            | GO:0090094 |  |
| GO:0070237 |  |            | GO:0014843 |  |
|            |  |            | GO:0072513 |  |
|            |  |            | GO:0061913 |  |
|            |  |            | GO:0061914 |  |
|            |  |            | GO:2000079 |  |
|            |  |            | GO:2000081 |  |

Gene Ontology (GO) Consortium terms for biological processes were used to annotate the genes with mutations in patients and controls.

**Supplementary Table S4. Immune cell subsets in the study patients.**

| ID | Disease             | EUROClass                                                   | TCRg | IgG  | IgM   | IgA   | CD3 (% of lymphocytes) | CD4/CD8 -ratio | NK cells (% of lymphocytes) |
|----|---------------------|-------------------------------------------------------------|------|------|-------|-------|------------------------|----------------|-----------------------------|
| 1  | CVID                | B+smB <sup>neg</sup> CD21 <sup>low</sup> Tr <sup>norm</sup> | neg  | 0.6  | <0.10 | <0.10 | 90                     | 0.7            | 4                           |
| 2  | CVID                | B+smB <sup>neg</sup> CD21 <sup>low</sup> Tr <sup>norm</sup> | ND   | 1.2  | 1.70  | <0.10 | 86                     | 1.4            | 10                          |
| 3  | CVID                | B-                                                          | pos  | 1.1  | 0.14  | <0.10 | 90                     | 0.4            | 9                           |
| 4  | CVID                | B+smB+CD21 <sup>norm</sup>                                  | ND   | 5.50 | 1.07  | 0.36  | 66                     | 2.5            | 26                          |
| 5  | CVID                | B+smB+CD21 <sup>low</sup>                                   | neg  | 0.60 | 0.10  | 0.10  | 88                     | 1.5            | 7                           |
| 6  | CVID                | B+smB+CD21 <sup>norm</sup>                                  | ND   | 3.90 | 0.20  | 1.24  | 88                     | 2.3            | 8                           |
| 7  | CVID                | B+smB <sup>neg</sup> CD21 <sup>low</sup> Tr <sup>norm</sup> | ND   | 1.10 | 0.27  | 0.10  | 85                     | 0.8            | 6                           |
| 8  | CVID                | B-                                                          | ND   | 2.80 | 0.38  | 0.00  | 90                     | 0.6            | 10                          |
| 9  | <i>STAT3</i><br>GOF | B+mB <sup>neg</sup> CD21 <sup>low</sup> Tr <sup>norm</sup>  | ND   | 5.6  | 3.38  | 1.67  | 71                     | 1.2            | 12                          |
| 10 | <i>STAT3</i><br>GOF | B+mB <sup>neg</sup> CD21 <sup>low</sup> Tr <sup>norm</sup>  | pos  | 2.8  | 1.44  | 0.21  | 86                     | 1.4            | 3-0.5                       |
| 11 | <i>STAT3</i><br>GOF | B+smB <sup>neg</sup> CD21 <sup>low</sup> Tr <sup>norm</sup> | ND   | 0.16 | 0.6   | 1.7   | 74                     | 2.3            | 4-13                        |
| 12 | Jacobsen<br>sdr     | B+smB+CD21 <sup>norm</sup>                                  | pos  | 3.6  | 0.81  | 0.51  | 87                     | 0.5            | 9                           |
| 13 | Other               | B+smB+CD21 <sup>norm</sup>                                  | neg  | 2.8  | 0.92  | 1.32  | 70                     | 5.1            | 23                          |
| 14 | Other               | B+smB+CD21 <sup>norm</sup>                                  | neg  | 8.1  | 1.01  | 0.38  | 72                     | 3.8            | 12                          |
| 15 | Other               | ND                                                          | ND   | 15.1 | 0.22  | 0.79  | 76                     | 4.6            | 16                          |
| 16 | Good sdr            | B-                                                          | pos  | 1.9  | <0.10 | <0.10 | 84                     | 0.1            | 16                          |
| 17 | ADA2<br>def         | B-                                                          | pos  | 0.8  | 0.24  | 0.16  | 99                     | 0.4            | <1%                         |

Characteristics of different adaptive immune cells of the patients included in the study are shown. B cell phenotypes were characterized according to the EUROClass classification system.<sup>5</sup>

Abbreviations: ND, not determined; TCRg, T-cell receptor gamma chain rearrangement; pos, positive; neg, negative; sdr, syndrome; GOF, gain-of-function.

**Supplementary Table S5. All somatic mutations identified in paired-sample analyses in CD4+ and CD8+ cells.**

| Pt. ID | Disease      | Cells | HGVS              | AA change                              | COSMIC                              | Gene           | VAF   | SIFT | Poly phen 2 |
|--------|--------------|-------|-------------------|----------------------------------------|-------------------------------------|----------------|-------|------|-------------|
| 1      | CVID         | CD8+  | 1:g.1804503C>G    | NM_001282539:exon6:c.G346C:p.G116R     |                                     | <i>GNB1</i>    | 0.07  | D    | D           |
| 1      | CVID         | CD8+  | 3:g.38580953G>A   | NM_198056:exon17:c.C3206T:p.T1069M     | COSM1422791,COSM1422790,COSM1422792 | <i>SCN5A</i>   | 0.055 | D    | D           |
| 1      | CVID         | CD8+  | 10:g.13136832C>T  | NM_001008212:exon15:c.C1700T:p.T567M   |                                     | <i>OPTN</i>    | 0.037 | D    | D           |
| 1      | CVID         | CD8+  | 19:g.16404674G>A  | NM_001258374:exon14:c.C1342T:p.R448C   |                                     | <i>EPS15L1</i> | 0.037 | D    | D           |
| 1      | CVID         | CD8+  | 5:g.38881704G>A   | NM_001323505:exon4:c.G358A:p.D120N     | COSM737822                          | <i>OSMR</i>    | 0.035 | T    | D           |
| 2      | CVID         | CD4+  | 4:g.105235713delC | NM_001127208:exon3:c.1771delC:p.Q591fs |                                     | <i>TET2</i>    | 0.056 | NA   | NA          |
| 2      | CVID         | CD4+  | 4:g.105243618G>T  | NM_001127208:exon6:c.G3643T:p.E1215X   | COSM3719016                         | <i>TET2</i>    | 0.053 | NA   | NA          |
| 2      | CVID         | CD4+  | 16:g.50699619G>T  | NM_022162:exon2:c.G205T:p.E69X         |                                     | <i>NOD2</i>    | 0.06  | NA   | NA          |
| 2      | CVID         | CD4+  | 4:g.105269703C>T  | NM_001127208:exon9:c.C4138T:p.H1380Y   | COSM87161                           | <i>TET2</i>    | 0.027 | D    | D           |
| 2      | CVID         | CD4+  | 16:g.66398469T>C  | NM_001795:exon10:c.T1499C:p.I500T      |                                     | <i>CDH5</i>    | 0.027 | D    | D           |
| 2      | CVID         | CD4+  | 17:g.42217380A>T  | NM_012448:exon10:c.T1254A:p.N418K      |                                     | <i>STAT5B</i>  | 0.036 | D    | D           |
| 2      | CVID         | CD4+  | 21:g.44426694C>T  | NM_001320350:exon27:c.C3980T:p.T1327M  | COSM242069                          | <i>TRPM2</i>   | 0.036 | T    | D           |
| 2      | CVID         | CD8+  | 11:g.89804202C>A  | NM_020358:exon3:c.G268T:p.E90X         |                                     | <i>TRIM49</i>  | 0.072 | NA   | NA          |
| 2      | CVID         | CD8+  | 20:g.62881301C>A  | NM_033081:exon16:c.G4655T:p.S1552I     |                                     | <i>DIDO1</i>   | 0.086 | T    | B           |
| 3      | CVID         | CD8+  | 7:g.100677602C>G  | NM_005273:exon6:c.C372G:p.Y124X        |                                     | <i>GNB2</i>    | 0.051 | NA   | NA          |
| 3      | CVID         | CD8+  | 11:g.75290010T>G  | NM_004041:exon2:c.A50C:p.K17T          |                                     | <i>ARRB1</i>   | 0.025 | D    | D           |
| 3      | CVID         | CD8+  | 17:g.63714087A>C  | NM_001003787:exon5:c.T145G:p.S49A      |                                     | <i>STRADA</i>  | 0.032 | D    | D           |
| 3      | CVID         | CD8+  | 1:g.153337250C>A  | NM_020393:exon8:c.G874T:p.V292F        |                                     | <i>PGLYRP4</i> | 0.043 | T    | D           |
| 3      | CVID         | CD8+  | 10:g.49646579G>A  | NM_020549:exon8:c.G1186A:p.V396M       |                                     | <i>CHAT</i>    | 0.024 | T    | B           |
| 4      | CVID         | CD4+  | 9:g.5073770G>T    | NM_001322195:exon13:c.G1849T:p.V617F   | COSM12600                           | <i>JAK2</i>    | 0.017 | D    | D           |
| 7      | CVID         | CD8+  | 12:g.9090395G>A   | NM_000014:exon20:c.C2557T:p.R853W      |                                     | <i>A2M</i>     | 0.03  | D    | D           |
| 8      | CVID         | CD8+  | 11:g.119028330G>A | NM_001164278:exon4:c.C245T:p.S82F      |                                     | <i>SLC37A4</i> | 0.022 | T    | B           |
| 8      | CVID         | CD8+  | 16:g.66617335G>A  | NM_178818:exon5:c.C647T:p.T216I        |                                     | <i>CMTM4</i>   | 0.021 | D    | B           |
| 12     | Jacobsen sdr | CD4+  | 5:g.83512294C>T   | NM_004385:exon6:c.C940T:p.Q314X        |                                     | <i>VCAN</i>    | 0.02  | NA   | NA          |
| 12     | Jacobsen sdr | CD4+  | 22:g.36929726C>T  | NM_000395:exon6:c.C637T:p.R213W        |                                     | <i>CSF2RB</i>  | 0.026 | D    | D           |
| 12     | Jacobsen sdr | CD4+  | 2:g.39336960T>C   | NM_003618:exon6:c.A374G:p.Y125C        |                                     | <i>MAP4K3</i>  | 0.042 | .    | D           |
| 12     | Jacobsen sdr | CD4+  | 17:g.29098415C>G  | NM_078471:exon24:c.G3811C:p.E1271Q     |                                     | <i>MYO18A</i>  | 0.027 | T    | D           |
| 12     | Jacobsen sdr | CD4+  | 19:g.47319962C>T  | NM_001736:exon2:c.C185T:p.T62M         | COSM400357                          | <i>C5AR1</i>   | 0.02  | T    | D           |
| 12     | Jacobsen sdr | CD8+  | 2:g.9526225T>A    | NM_003183:exon6:c.A639T:p.K213N        |                                     | <i>ADAM17</i>  | 0.031 | T    | P           |
| 12     | Jacobsen sdr | CD8+  | 2:g.47839497C>G   | NM_001190274:exon3:c.G364C:p.A122P     |                                     | <i>FBXO11</i>  | 0.037 | T    | P           |
| 12     | Jacobsen sdr | CD8+  | X:g.21432736G>A   | NM_014927:exon3:c.G353A:p.R118Q        |                                     | <i>CNKSR2</i>  | 0.03  | T    | D           |
| 13     | Other        | CD4+  | 17:g.42210194G>C  | NM_012448:exon15:c.C1883G:p.T628S      | COSM6022929                         | <i>STAT5B</i>  | 0.032 | D    | D           |
| 15     | Other        | CD8+  | 20:g.3706656C>A   | NM_023068:exon2:c.G100T:p.G34W         |                                     | <i>SIGLEC1</i> | 0.028 | D    | D           |

|      |             |      |                   |                                             |                             |                 |       |    |    |
|------|-------------|------|-------------------|---------------------------------------------|-----------------------------|-----------------|-------|----|----|
| 15   | Other       | CD8+ | 22:g.25667739C>G  | NM_005160:exon6:c.C442<br>G:p.P148A         |                             | <i>GRK3</i>     | 0.034 | P  | P  |
| 16   | Good sdr    | CD4+ | 3:g.185624078C>T  | NM_021627:exon15:c.C16<br>07T:p.P536L       |                             | <i>SENP2</i>    | 0.035 | D  | P  |
| 16   | Good sdr    | CD8+ | 16:g.3243607delT  | NM_000243:exon10:c.188<br>0delA:p.E627fs    |                             | <i>MEFV</i>     | 0.242 | NA | NA |
| 16   | Good sdr    | CD8+ | 1:g.56692436C>T   | NM_006252:exon4:c.C409<br>T:p.H137Y         |                             | <i>PRKAA2</i>   | 0.032 | D  | D  |
| 16   | Good sdr    | CD8+ | 12:g.25227351G>A  | NM_004985:exon3:c.C173<br>T:p.T58I          | COSM87288,COSM54905<br>13   | <i>KRAS</i>     | 0.079 | D  | D  |
| 16   | Good sdr    | CD8+ | 15:g.41573360A>T  | NM_006293:exon17:c.A20<br>38T:p.I680F       |                             | <i>TYRO3</i>    | 0.079 | D  | D  |
| 16   | Good sdr    | CD8+ | 19:g.13298754G>A  | NM_023035:exon19:c.C28<br>91T:p.A964V       |                             | <i>CACNA1A</i>  | 0.07  | T  | P  |
| 16   | Good sdr    | CD8+ | 19:g.19535620G>A  | NM_198537:exon6:c.G635<br>A:p.R212H         |                             | <i>YJEFN3</i>   | 0.292 | T  | D  |
| 16   | Good sdr    | CD8+ | 19:g.47320366C>T  | NM_001736:exon2:c.C589<br>T:p.R197W         | COSM4667798                 | <i>C5ARI</i>    | 0.13  | T  | P  |
| 17   | ADA2<br>def | CD8+ | 11:g.18026604C>T  | NM_004179:exon6:c.G689<br>A:p.R230H         |                             | <i>TPHI</i>     | 0.029 | D  | D  |
| 17   | ADA2<br>def | CD8+ | 5:g.138466921G>A  | NM_001964:exon2:c.G472<br>A:p.V158I         |                             | <i>EGR1</i>     | 0.023 | D  | P  |
| 17   | ADA2<br>def | CD8+ | 12:g.107319038A>G | NM_001018072:exon1:c.A<br>98G:p.N33S        |                             | <i>BTBD11</i>   | 0.03  | T  | B  |
| HC1  | Healthy     | CD8+ | 9:g.35707732T>C   | NM_006289:exon35:c.A46<br>31G:p.K1544R      |                             | <i>TLN1</i>     | 0.021 | T  | P  |
| HC3  | Healthy     | CD8+ | 15:g.41056702G>A  | NM_017553:exon17:c.C19<br>90T:p.R664C       | COSM5383245,COSM538<br>3244 | <i>INO80</i>    | 0.068 | D  | D  |
| HC10 | Healthy     | CD8+ | 11:g.27674144A>C  | NM_001143810:exon2:c.T<br>141G:p.C47W       |                             | <i>BDNF</i>     | 0.03  | D  | P  |
| HC10 | Healthy     | CD8+ | 19:g.55912295G>C  | NLRP13:NM_176810:exo<br>n5:c.C1522G:p.L508V |                             | <i>NLRP13</i>   | 0.031 | T  | D  |
| HC11 | Healthy     | CD8+ | 2:g.25240306A>G   | NM_175629:exon19:c.T23<br>18C:p.L773P       | COSM1583115                 | <i>DNMT3A</i>   | 0.043 | D  | D  |
| HC11 | Healthy     | CD8+ | 5:g.170270842C>G  | NM_005565:exon7:c.G400<br>C:p.E134Q         |                             | <i>LCP2</i>     | 0.045 | T  | P  |
| HC11 | Healthy     | CD8+ | 9:g.130880097T>C  | NM_007313:exon9:c.T151<br>0C:p.S504P        |                             | <i>ABL1</i>     | 0.059 | D  | P  |
| HC15 | Healthy     | CD8+ | 3:g.49302514A>G   | NM_003363:exon10:c.T11<br>57C:p.F386S       |                             | <i>USP4</i>     | 0.043 | D  | D  |
| HC15 | Healthy     | CD8+ | 5:g.111072933G>A  | NM_033035:exon2:c.216+<br>1G>A              |                             | <i>TSLP</i>     | 0.049 | NA | NA |
| HC16 | Healthy     | CD8+ | 3:g.184365148T>G  | NM_001278698:exon3:c.T<br>173G:p.L58W       |                             | <i>POLR2H</i>   | 0.032 | D  | D  |
| HC16 | Healthy     | CD8+ | 4:g.38797118T>C   | NM_003263:exon4:c.A171<br>4G:p.M572V        |                             | <i>TLR1</i>     | 0.021 | T  | B  |
| HC16 | Healthy     | CD8+ | 19:g.51501460G>A  | NM_053003:exon1:c.C274<br>T:p.R92X          | COSM4766319                 | <i>SIGLEC12</i> | 0.023 | NA | NA |
| HC17 | Healthy     | CD4+ | 7:g.2002123T>A    | NM_001013836:exon15:c.<br>1360-2A>T         |                             | <i>MADIL1</i>   | 0.044 | NA | NA |
| HC17 | Healthy     | CD4+ | 19:g.51458037C>G  | NM_014442:exon1:c.G351<br>C:p.R117S         |                             | <i>SIGLEC8</i>  | 0.024 | T  | B  |
| HC17 | Healthy     | CD8+ | 5:g.148827319T>G  | NM_000024:exon1:c.T488<br>G:p.L163R         |                             | <i>ADRB2</i>    | 0.057 | D  | D  |
| HC17 | Healthy     | CD8+ | 15:g.74036026C>G  | NM_033247:exon5:c.C127<br>4G:p.A425G        |                             | <i>PML</i>      | 0.025 | T  | B  |
| HC17 | Healthy     | CD8+ | 16:g.31266064A>T  | NM_001145808:exon5:c.A<br>344T:p.E115V      |                             | <i>ITGAM</i>    | 0.05  | D  | P  |
| HC17 | Healthy     | CD8+ | 21:g.31251838C>G  | NM_003253:exon6:c.G131<br>5C:p.A439P        |                             | <i>TIAM1</i>    | 0.029 | T  | D  |
| HC17 | Healthy     | CD8+ | 21:g.31266560T>A  | NM_003253:exon5:c.A413<br>T:p.D138V         |                             | <i>TIAM1</i>    | 0.047 | D  | P  |
| HC18 | Healthy     | CD8+ | 7:g.84011182C>T   | NM_006080:exon9:c.925+<br>1G>A              |                             | <i>SEMA3A</i>   | 0.037 | NA | NA |
| HC18 | Healthy     | CD8+ | 8:g.99192975A>G   | NM_017890:exon17:c.A24<br>33G:p.I811M       |                             | <i>VPS13B</i>   | 0.02  | D  | P  |
| HC18 | Healthy     | CD8+ | 12:g.7499159G>A   | NM_004244:exon4:c.C487<br>T:p.R163C         | COSM4670363,COSM467<br>0362 | <i>CD163</i>    | 0.034 | D  | B  |
| HC18 | Healthy     | CD8+ | 14:g.68880046C>G  | NM_001130004:exon18:c.<br>G2196C:p.E732D    |                             | <i>ACTN1</i>    | 0.02  | T  | P  |
| HC18 | Healthy     | CD8+ | 18:g.23556356T>C  | NM_000271:exon8:c.A121<br>3G:p.T405A        |                             | <i>NPC1</i>     | 0.028 | T  | B  |
| HC20 | Healthy     | CD8+ | 7:g.48508005C>A   | NM_152701:exon50:c.C13<br>480A:p.L4494I     |                             | <i>ABCA13</i>   | 0.029 | T  | D  |



|      |         |      |                   |                                    |                                     |              |       |   |   |
|------|---------|------|-------------------|------------------------------------|-------------------------------------|--------------|-------|---|---|
| HC20 | Healthy | CD8+ | 10:g.122576623C>T | NM_001320644:exon7:c.C508T:p.R170C | COSM3367939,COSM3367940,COSM3367938 | <i>DMBT1</i> | 0.042 | T | D |
| HC20 | Healthy | CD8+ | 11:g.129870009T>C | NM_006165:exon22:c.A3091G:p.I1031V |                                     | <i>NFRKB</i> | 0.054 | T | P |
| HC21 | Healthy | CD4+ | 1:g.114716123C>T  | NM_002524:exon2:c.G38A:p.G13D      | COSM573                             | <i>NRAS</i>  | 0.018 | D | B |

All mutations discovered in healthy controls and immunodeficiency patients in CD4+ and CD8+ cells by paired-sample analyses by MuTect2. Abbreviations: Pt., patient; AA, amino acid; VAF, variant allele frequency; SIFT, SIFT prediction; PolyPhen2, Polyphen2 HDIV prediction; T, tolerated; D, deleterious (SIFT)/probably damaging (PolyPhen2); B, benign; P, possibly damaging; NA, not available (splice-site, frameshift, or nonsense variant).

**Supplementary table S6. Somatic mutations in T cells do not occur in non-hematopoietic tissue samples.**

| Pt. ID | Disease | HGVS             | AA change                         | Gene           | VAF in CD8+ | CD8+          |              | CD4+          |              | Skin          |              |
|--------|---------|------------------|-----------------------------------|----------------|-------------|---------------|--------------|---------------|--------------|---------------|--------------|
|        |         |                  |                                   |                |             | Variant reads | Normal reads | Variant reads | Normal reads | Variant reads | Normal reads |
| 7      | CVID    | 12:g.9090395G>A  | NM_000014:exon20:c.C2557T:p.R853W | <i>A2M</i>     | 0.03        | 14            | 462          | 0             | 535          | 0             | 427          |
| 15     | Other   | 20:g.3706656C>A  | NM_023068:exon2:c.G100T:p.G34W    | <i>SIGLEC1</i> | 0.028       | 11            | 331          | 0             | 285          | 0             | 359          |
| 15     | Other   | 22:g.25667739C>G | NM_005160:exon6:c.C442G:p.P148A   | <i>GRK3</i>    | 0.034       | 25            | 692          | 0             | 740          | 0             | 765          |

Most of our data on somatic mutations has been called using paired-sample comparisons between CD4+ and CD8+ cells. However, from two patients, we had DNA available from non-hematopoietic tissues (patient 7: skin fibroblasts; patient 15: skin biopsy). These samples were sequenced with the same sequencing panel as CD4+ and CD8+ cells. The table shows the sequencing results from these patient samples. Somatic variants were called using a paired-sample strategy, CD4+ cells vs. CD8+ and *vice versa*, but also using the non-hematopoietic tissue sample as a control sample. Three different somatic variants were identified in these patients, but the variants were discovered to exist only in CD8+ cells, regardless of which germline control (CD4+ or non-hematopoietic tissue) was used. Only CD8+ cells harbored sequencing reads that supported the variant; these reads did not exist in CD4+ or in non-hematopoietic tissue samples. Abbreviations: Pt., patient; AA, amino acid; VAF, variant allele frequency.

**Supplementary Table S7. Mapped bases in sequenced samples.**

| ID   | Disease            | Sex | Age | Mapped bases<br>CD4+ | Mapped bases<br>CD8+ | Library  |
|------|--------------------|-----|-----|----------------------|----------------------|----------|
| 1    | CVID               | M   | 61  | 5 547 239 430        | 5 264 291 170        | Kapa     |
| 2    | CVID               | M   | 67  | 5 605 211 973        | 4 424 304 170        | Kapa     |
| 3    | CVID               | M   | 54  | 6 425 897 948        | 6 289 169 731        | Kapa     |
| 4    | CVID               | M   | 70  | 7 913 485 919        | 8 249 467 672        | Kapa     |
| 5    | CVID               | F   | 70  | 6 111 957 589        | 5 949 483 474        | Kapa     |
| 6    | CVID               | F   | 67  | 8 409 971 358        | 7 793 689 636        | Kapa     |
| 7    | CVID               | F   | 35  | 5 794 543 945        | 5 843 367 134        | Kapa     |
| 8    | CVID               | M   | 37  | 5 843 723 928        | 5 172 024 026        | Kapa     |
| 9    | STAT3 GOF          | F   | 17  | 5 893 167 691        | 5 986 103 640        | Kapa     |
| 10   | STAT3 GOF          | F   | 15  | 6 686 032 805        | 6 307 531 709        | Kapa     |
| 11   | STAT3 GOF          | F   | 22  | 6 283 989 638        | 5 740 280 375        | Kapa     |
| 12   | Jacobsen sdr       | F   | 46  | 9 142 391 648        | 9 203 546 364        | Kapa     |
| 13   | Other              | F   | 73  | 8 908 263 746        | 8 932 451 607        | Kapa     |
| 14   | Other              | F   | 70  | 6 227 668 622        | 6 191 344 170        | Kapa     |
| 15   | Other              | M   | 60  | 5 880 893 385        | 6 520 578 161        | Kapa     |
| 16   | Good sdr           | M   | 70  | 5 799 566 210        | 6 230 264 907        | Kapa     |
| 17   | ADA2<br>deficiency | F   | 41  | 5 944 877 329        | 6 040 071 375        | Kapa     |
| HC1  | HC                 | F   | 58  | 4 836 247 489        | 4 907 094 913        | Kapa     |
| HC10 | HC                 | F   | 47  | 3 332 774 616        | 3 000 407 005        | ThruPLEX |
| HC11 | HC                 | M   | 48  | 3 006 395 425        | 3 839 564 953        | ThruPLEX |
| HC12 | HC                 | F   | 21  | 1 537 950 784        | 3 041 728 643        | ThruPLEX |
| HC13 | HC                 | F   | 66  | 5 178 847 798        | 4 906 517 851        | Kapa     |
| HC14 | HC                 | F   | 63  | 3 915 254 480        | 4 303 882 913        | Kapa     |
| HC15 | HC                 | M   | 63  | 4 255 679 405        | 4 062 759 031        | Kapa     |
| HC16 | HC                 | F   | 65  | 5 326 558 097        | 5 534 346 901        | Kapa     |
| HC17 | HC                 | M   | 64  | 5 485 499 484        | 5 668 209 736        | Kapa     |
| HC18 | HC                 | F   | 65  | 4 360 042 314        | 4 283 227 672        | Kapa     |
| HC19 | HC                 | M   | 64  | 4 324 897 537        | 4 645 201 325        | Kapa     |
| HC2  | HC                 | M   | 58  | 4 840 430 099        | 4 898 833 343        | Kapa     |
| HC20 | HC                 | F   | 63  | 4 651 864 808        | 4 815 541 862        | Kapa     |
| HC21 | HC                 | M   | 64  | 4 688 775 892        | 4 567 660 361        | Kapa     |
| HC3  | HC                 | F   | 65  | 5 001 034 164        | 5 223 776 490        | Kapa     |
| HC4  | HC                 | F   | 44  | 3 377 389 646        | 2 296 486 796        | ThruPLEX |
| HC5  | HC                 | M   | 55  | 2 865 922 283        | 3 585 929 964        | ThruPLEX |
| HC6  | HC                 | M   | 52  | 3 163 636 155        | 4 482 310 699        | ThruPLEX |
| HC7  | HC                 | M   | 48  | 1 332 951 785        | 3 315 440 185        | ThruPLEX |
| HC8  | HC                 | F   | 57  | 3 012 854 365        | 3 367 018 062        | ThruPLEX |
| HC9  | HC                 | F   | 56  | 3 083 658 397        | 2 669 438 976        | ThruPLEX |

The numbers of mapped bases in immunogene sequencing for healthy controls and immunodeficiency patients. Abbreviations: HC, healthy control; GOF, gain-of-function; sdr,

syndrome; Library, sequencing library preparation kit; Kapa, Kapa Hyper library preparation kit (Roche); ThruPLEX, ThruPLEX DNA-seq Library Preparation Kit (Rubicon Genomics).

**Supplementary Table S8. Clonal hematopoiesis variants occurring in both CD4+ and CD8+ cells.**

| Patient | AA change                                                      | Consequence | CD4+ (VAF) | CD8+ (VAF) | Targeted deep seq of sorted cells (VAF) |           |       |       |       |
|---------|----------------------------------------------------------------|-------------|------------|------------|-----------------------------------------|-----------|-------|-------|-------|
|         |                                                                |             |            |            | CD3+ CD4+                               | CD3+ CD8+ | CD19+ | CD14+ | WB    |
| 13      | <i>DNMT3A</i> :NM_022552:exon 20:c.2388dupT;p.N797_L798delinsX | nonsense    | 0.043      | 0.038      | 0.046                                   | 0.030     | 0.027 | 0     | 0.037 |
| 2       | <i>TET2</i> :NM_001127208:exon 6:c.G3643T;p.E1215X             | nonsense    | 0.053      | 0.027      | 0.039                                   | 0         | 0.040 | 0     | 0.010 |
| 2       | <i>TET2</i> :NM_001127208:exon 11:c.C4889G;p.S1630X            | nonsense    | 0.041      | 0.032      | 0.037                                   | 0.023     | 0     | 0     | 0     |

We performed a sorting and sequencing experiment to investigate in which cell types the variants associated with clonal hematopoiesis existed. CD3+CD4+, CD3+CD8+, CD19+, CD14+ and whole-blood cells were sequenced with targeted deep Amplicon sequencing. The VAFs in each cell fraction are shown in the table. In addition to T-cell fractions, mutations were also found in CD19+ B cells, but not in CD14+ monocytes. Abbreviations: VAF, variant allele frequency; AA, amino acid; WB, whole blood.

**Supplementary Table S9. The sequencing panel for mutation validations.**

| Gene name       | Control position or somatic variant? | Chr | Position (GRCh38) | COSMIC identifier                   |
|-----------------|--------------------------------------|-----|-------------------|-------------------------------------|
| <i>GNB1</i>     | control                              | 1   | 1815790           | COSM211450                          |
| <i>TET2</i>     | control                              | 4   | 105276128         | COSM41741                           |
| <i>NOD2</i>     | control                              | 16  | 50710787          | COSM2834328                         |
| <i>GNB2</i>     | control                              | 7   | 100678546         | COSM4687440                         |
| <i>JAK2</i>     | control                              | 9   | 5078360           | COSM29300                           |
| <i>A2M</i>      | control                              | 12  | 9112203           | COSM1177109                         |
| <i>CSF2RB</i>   | control                              | 22  | 36936577          | COSM4411434                         |
| <i>STAT5B</i>   | control                              | 17  | 42202370          | COSM1716827                         |
| <i>SIGLEC1</i>  | control                              | 20  | 3694821           | COSM84704                           |
| <i>KRAS</i>     | control                              | 12  | 25245350          | COSM521                             |
| <i>C5ARI</i>    | control                              | 19  | 47320786          | COSM1751014                         |
| <i>EGR1</i>     | control                              | 5   | 138467408         | COSM74487                           |
| <i>DNMT3A</i>   | control                              | 2   | 25234373          | COSM52944                           |
| <i>SIGLEC12</i> | control                              | 19  | 51499608          | COSM116869                          |
| <i>CD163</i>    | control                              | 12  | 7486950           | COSM298612                          |
| <i>DMBT1</i>    | control                              | 10  | 122643283         | COSM1346480                         |
| <i>NRAS</i>     | control                              | 1   | 114713909         | COSM580                             |
| <i>GNB1</i>     | somatic variant                      | 1   | 1804503           |                                     |
| <i>TET2</i>     | somatic variant                      | 4   | 105235713         |                                     |
| <i>TET2</i>     | somatic variant                      | 4   | 105243618         | COSM3719016                         |
| <i>NOD2</i>     | somatic variant                      | 16  | 50699619          |                                     |
| <i>TET2</i>     | somatic variant                      | 4   | 105269703         | COSM87161                           |
| <i>STAT5B</i>   | somatic variant                      | 17  | 42217380          |                                     |
| <i>GNB2</i>     | somatic variant                      | 7   | 100677602         |                                     |
| <i>JAK2</i>     | somatic variant                      | 9   | 5073770           | COSM12600                           |
| <i>A2M</i>      | somatic variant                      | 12  | 9090395           |                                     |
| <i>CSF2RB</i>   | somatic variant                      | 22  | 36929726          |                                     |
| <i>STAT5B</i>   | somatic variant                      | 17  | 42210194          | COSM6022929                         |
| <i>SIGLEC1</i>  | somatic variant                      | 20  | 3706656           |                                     |
| <i>KRAS</i>     | somatic variant                      | 12  | 25227351          | COSM87288,COSM5490513               |
| <i>C5ARI</i>    | somatic variant                      | 19  | 47320366          | COSM4667798                         |
| <i>EGR1</i>     | somatic variant                      | 5   | 138466921         |                                     |
| <i>DNMT3A</i>   | somatic variant                      | 2   | 25240306          | COSM1583115                         |
| <i>SIGLEC12</i> | somatic variant                      | 19  | 51501460          | COSM4766319                         |
| <i>CD163</i>    | somatic variant                      | 12  | 7499159           | COSM4670363,COSM4670362             |
| <i>DMBT1</i>    | somatic variant                      | 10  | 122576623         | COSM3367939,COSM3367940,COSM3367938 |
| <i>NRAS</i>     | somatic variant                      | 1   | 114716123         | COSM573                             |
| <i>DNMT3A</i>   | somatic variant                      | 2   | 25239149          |                                     |
| <i>TET2</i>     | somatic variant                      | 4   | 105235712         |                                     |

---

|               |                 |   |           |             |
|---------------|-----------------|---|-----------|-------------|
| <i>TET2</i>   | somatic variant | 4 | 105275399 | COSM5945066 |
| <i>DNMT3A</i> | somatic variant | 2 | 25244616  | COSM1583077 |

---

A ParagonGenomics CleanPlex Custom Amplicon panel was designed to perform confirmative a sequencing experiment on the discovered somatic mutations. Positions covered by the multiplex panel are listed above. The panel included 24 mutation positions and 17 control positions. The individual with the *SIGLEC12* mutation (HC16) was not included in sequencing due to sample amount restraints, although the position was included in the panel.

**Supplementary Table S10. Confirmatory Amplicon sequencing on selected variants.**

| Pt. ID | Disease      | Cells | HGVS              | AA change                            | Gene           | VAF in immunopanel | VAF in amplicon sequencing |
|--------|--------------|-------|-------------------|--------------------------------------|----------------|--------------------|----------------------------|
| 1      | CVID         | CD8+  | 1:g.1804503C>G    | NM_001282539:exon6:c.G346C:p.G116R   | <i>GNB1</i>    | 0.07               | 0.056                      |
| 2      | CVID         | CD4+  | 17:g.42217380A>T  | NM_012448:exon10:c.T1254A:p.N418K    | <i>STAT5B</i>  | 0.036              | 0.060                      |
| 2      | CVID         | CD4+  | 4:g.105243618G>T  | NM_001127208:exon6:c.G3643T:p.E1215X | <i>TET2</i>    | 0.053              | 0.026                      |
| 2      | CVID         | CD4+  | 16:g.50699619G>T  | NM_022162:exon2:c.G205T:p.E69X       | <i>NOD2</i>    | 0.06               | 0.064                      |
| 2      | CVID         | CD4+  | 4:g.105269703C>T  | NM_001127208:exon9:c.C4138T:p.H1380Y | <i>TET2</i>    | 0.027              | 0.020                      |
| 3      | CVID         | CD8+  | 7:g.100677602C>G  | NM_005273:exon6:c.C372G:p.Y124X      | <i>GNB2</i>    | 0.051              | 0.038                      |
| 7      | CVID         | CD8+  | 12:g.9090395G>A   | NM_000014:exon20:c.C2557T:p.R853W    | <i>A2M</i>     | 0.03               | 0.029                      |
| 12     | Jacobsen sdr | CD4+  | 22:g.36929726C>T  | NM_000395:exon6:c.C637T:p.R213W      | <i>CSF2RB</i>  | 0.026              | 0.015                      |
| 13     | Other        | CD4+  | 17:g.42210194G>C  | NM_012448:exon15:c.C1883G:p.T628S    | <i>STAT5B</i>  | 0.032              | 0.035                      |
| 15     | Other        | CD8+  | 20:g.3706656C>A   | NM_023068:exon2:c.G100T:p.G34W       | <i>SIGLEC1</i> | 0.028              | 0.023                      |
| 16     | Good sdr     | CD8+  | 12:g.25227351G>A  | NM_004985:exon3:c.C173T:p.T58I       | <i>KRAS</i>    | 0.079              | 0.073                      |
| 16     | Good sdr     | CD8+  | 19:g.47320366C>T  | NM_001736:exon2:c.C589T:p.R197W      | <i>C5ARI</i>   | 0.13               | 0.101                      |
| 17     | ADA2 def     | CD8+  | 5:g.138466921G>A  | NM_001964:exon2:c.G472A:p.V158I      | <i>EGR1</i>    | 0.023              | 0.031                      |
| HC11   | Healthy      | CD8+  | 2:g.25240306A>G   | NM_175629:exon19:c.T2318C:p.L773P    | <i>DNMT3A</i>  | 0.043              | 0.034                      |
| HC18   | Healthy      | CD8+  | 12:g.7499159G>A   | NM_004244:exon4:c.C487T:p.R163C      | <i>CD163</i>   | 0.034              | 0.031                      |
| HC20   | Healthy      | CD8+  | 10:g.122576623C>T | NM_001320644:exon7:c.C508T:p.R170C   | <i>DMBT1</i>   | 0.042              | 0.036                      |
| HC21   | Healthy      | CD4+  | 1:g.114716123C>T  | NM_002524:exon2:c.G38A:p.G13D        | <i>NRAS</i>    | 0.018              | 0.023                      |

Amplicon sequencing was performed to confirm a subset of somatic mutations. The table shows the mutations identified by paired-sample calling in immunogene panel sequencing. Mutations associated with clonal hematopoiesis are presented in Supplementary Table S8. The variant allele frequencies (VAFs), determined by both immunogene panel and amplicon sequencing, are shown. Abbreviations: Pt., patient; AA, amino acid; VAF, variant allele frequency. All variants that were covered by sufficient sequencing depth were confirmed by an independent method, targeted deep amplicon sequencing.



**Supplementary Table S11. Amino-acid properties of convergent and highly expanded TCRs.**

|                        |                          | Peptide hydrophobicity | Charge  | PP1 (~polarity)     | PP2 (~hydrophobicity) | PP3 (~Hydrogen bonding) |
|------------------------|--------------------------|------------------------|---------|---------------------|-----------------------|-------------------------|
| CD8+ highly convergent | Difference between means | -0.0988                | 0.0329  | 0.0297              | 0.0073                | -0.0064                 |
|                        | CI lower                 | -0.1339                | -0.0352 | 0.0190              | 0.0015                | -0.0133                 |
|                        | CI higher                | -0.0637                | 0.1011  | 0.0405              | 0.0131                | 0.0006                  |
|                        | p-value                  | <b>3.696*10E-08</b>    | 0.3429  | <b>6.321*10E-08</b> | <b>0.0137</b>         | 0.0731                  |
| CD8+ Highly expanded   | Difference between means | -0.0681                | -0.1623 | 0.0220              | 0.0030                | -0.0201                 |
|                        | CI lower                 | -0.2150                | -0.4666 | -0.0254             | -0.0219               | -0.0520                 |
|                        | CI higher                | 0.0788                 | 0.1420  | 0.0694              | 0.0278                | 0.0118                  |
|                        | p-value                  | 0.3607                 | 0.2934  | 0.3593              | 0.8131                | 0.2136                  |
| CD4+ Highly convergent | Difference between means | -0.0196                | 0.0306  | -0.0005             | -0.0021               | 0.0120                  |
|                        | CI lower                 | -0.1192                | -0.1467 | -0.0289             | -0.0188               | -0.0055                 |
|                        | CI higher                | 0.0801                 | 0.2078  | 0.0279              | 0.0146                | 0.0295                  |
|                        | p-value                  | 0.6993                 | 0.7342  | 0.9703              | 0.8042                | 0.1789                  |
| CD4+ Highly expanded   | Difference between means | 0.0639                 | 0.0765  | -0.0101             | -0.0045               | 0.0166                  |
|                        | CI lower                 | -0.0739                | -0.1597 | -0.0488             | -0.0264               | -0.0069                 |
|                        | CI higher                | 0.2017                 | 0.3127  | 0.0287              | 0.0173                | 0.0402                  |
|                        | p-value                  | 0.3613                 | 0.5233  | 0.6083              | 0.6810                | 0.1652                  |

The amino-acid properties (PP1, PP2, and PP3 by Cruciani *et al*)<sup>14</sup> were compared between selected TCR subsets between CVID patients and healthy controls by a Welch T-test. No multiple comparison adjustments were made. The table shows the test p-values, differences between means (CVID vs healthy), and 95% confidence intervals for the difference between means. “Highly convergent” and “highly expanded” TCR definitions are included in the Methods-section. CVID CD8+ convergent TCRs showed differential physico-chemical properties when compared to healthy controls’ convergent TCRs, but no differences existed between CVID and controls in CD4+ cells, or “highly expanded” CD8+ TCRs. Abbreviations: HC, healthy control.

**Supplementary Table S12. T-cell clone sizes and mutation VAFs.**

| Pt. ID | Disease           | Cells | Gene           | AA change                              | HGVS              | max clone size       | VAF   |
|--------|-------------------|-------|----------------|----------------------------------------|-------------------|----------------------|-------|
| 1      | CVID              | CD8+  | <i>GNB1</i>    | NM_001282539:exon6:c.G346C:p.G116R     | 1:g.1804503C>G    | 0.173069224          | 0.07  |
| 1      | CVID              | CD8+  | <i>SCN5A</i>   | NM_198056:exon17:c.C3206T:p.T1069M     | 3:g.38580953G>A   | 0.173069224          | 0.055 |
| 1      | CVID              | CD8+  | <i>OPTN</i>    | NM_001008212:exon15:c.C1700T:p.T567M   | 10:g.13136832C>T  | 0.173069224          | 0.037 |
| 1      | CVID              | CD8+  | <i>EPS15L1</i> | NM_001258374:exon14:c.C1342T:p.R448C   | 19:g.16404674G>A  | 0.173069224          | 0.037 |
| 1      | CVID              | CD8+  | <i>OSMR</i>    | NM_001323505:exon4:c.G358A:p.D120N     | 5:g.38881704G>A   | 0.173069224          | 0.035 |
| 2      | CVID              | CD4+  | <i>TET2</i>    | NM_001127208:exon3:c.1771delC:p.Q591fs | 4:g.105235713delC | 0.004372718829553281 | 0.056 |
| 2      | CVID              | CD4+  | <i>TET2</i>    | NM_001127208:exon6:c.G3643T:p.E1215X   | 4:g.105243618G>T  | 0.004372718829553281 | 0.053 |
| 2      | CVID              | CD4+  | <i>NOD2</i>    | NM_022162:exon2:c.G205T:p.E69X         | 16:g.50699619G>T  | 0.004372718829553281 | 0.06  |
| 2      | CVID              | CD4+  | <i>TET2</i>    | NM_001127208:exon9:c.C4138T:p.H1380Y   | 4:g.105269703C>T  | 0.004372718829553281 | 0.027 |
| 2      | CVID              | CD4+  | <i>CDH5</i>    | NM_001795:exon10:c.T1499C:p.I500T      | 16:g.66398469T>C  | 0.004372718829553281 | 0.027 |
| 2      | CVID              | CD4+  | <i>STAT5B</i>  | NM_012448:exon10:c.T1254A:p.N418K      | 17:g.42217380A>T  | 0.004372718829553281 | 0.036 |
| 2      | CVID              | CD4+  | <i>TRPM2</i>   | NM_001320350:exon27:c.C3980T:p.T1327M  | 21:g.44426694C>T  | 0.004372718829553281 | 0.036 |
| 2      | CVID              | CD8+  | <i>TRIM49</i>  | NM_020358:exon3:c.G268T:p.E90X         | 11:g.89804202C>A  | 0.202465609          | 0.072 |
| 2      | CVID              | CD8+  | <i>DIDO1</i>   | NM_033081:exon16:c.G4655T:p.S1552I     | 20:g.62881301C>A  | 0.202465609          | 0.086 |
| 3      | CVID              | CD8+  | <i>GNB2</i>    | NM_005273:exon6:c.C372G:p.Y124X        | 7:g.100677602C>G  | 0.0646392182         | 0.051 |
| 3      | CVID              | CD8+  | <i>ARRB1</i>   | NM_004041:exon2:c.A50C:p.K17T          | 11:g.75290010T>G  | 0.0646392182         | 0.025 |
| 3      | CVID              | CD8+  | <i>STRADA</i>  | NM_001003787:exon5:c.T145G:p.S49A      | 17:g.63714087A>C  | 0.0646392182         | 0.032 |
| 3      | CVID              | CD8+  | <i>PGLYRP4</i> | NM_020393:exon8:c.G874T:p.V292F        | 1:g.153337250C>A  | 0.0646392182         | 0.043 |
| 3      | CVID              | CD8+  | <i>CHAT</i>    | NM_020549:exon8:c.G1186A:p.V396M       | 10:g.49646579G>A  | 0.0646392182         | 0.024 |
| 4      | CVID              | CD4+  | <i>JAK2</i>    | NM_001322195:exon13:c.G1849T:p.V617F   | 9:g.5073770G>T    | 0.002205217535162855 | 0.017 |
| 7      | CVID              | CD8+  | <i>A2M</i>     | NM_000014:exon20:c.C2557T:p.R853W      | 12:g.9090395G>A   | 0.0647578761         | 0.03  |
| 8      | CVID              | CD8+  | <i>SLC37A4</i> | NM_001164278:exon4:c.C245T:p.S82F      | 11:g.119028330G>A | NA                   | 0.022 |
| 8      | CVID              | CD8+  | <i>CMTM4</i>   | NM_178818:exon5:c.C647T:p.T216I        | 16:g.66617335G>A  | NA                   | 0.021 |
| 12     | Jacobsen syndrome | CD4+  | <i>VCAN</i>    | NM_004385:exon6:c.C940T:p.Q314X        | 5:g.83512294C>T   | 0.0717540607         | 0.02  |
| 12     | Jacobsen syndrome | CD4+  | <i>CSF2RB</i>  | NM_000395:exon6:c.C637T:p.R213W        | 22:g.36929726C>T  | 0.0717540607         | 0.026 |
| 12     | Jacobsen syndrome | CD4+  | <i>MAP4K3</i>  | NM_003618:exon6:c.A374G:p.Y125C        | 2:g.39336960T>C   | 0.0717540607         | 0.042 |
| 12     | Jacobsen syndrome | CD4+  | <i>MYO18A</i>  | NM_078471:exon24:c.G3811C:p.E1271Q     | 17:g.29098415C>G  | 0.0717540607         | 0.027 |
| 12     | Jacobsen syndrome | CD4+  | <i>C5AR1</i>   | NM_001736:exon2:c.C185T:p.T62M         | 19:g.47319962C>T  | 0.0717540607         | 0.02  |
| 12     | Jacobsen syndrome | CD8+  | <i>ADAM17</i>  | NM_003183:exon6:c.A639T:p.K213N        | 2:g.9526225T>A    | 0.110719606          | 0.031 |
| 12     | Jacobsen syndrome | CD8+  | <i>FBXO11</i>  | NM_001190274:exon3:c.G364C:p.A122P     | 2:g.47839497C>G   | 0.110719606          | 0.037 |
| 12     | Jacobsen syndrome | CD8+  | <i>CNKSR2</i>  | NM_014927:exon3:c.G353A:p.R118Q        | X:g.21432736G>A   | 0.110719606          | 0.03  |
| 13     | Other             | CD4+  | <i>STAT5B</i>  | NM_012448:exon15:c.C1883G:p.T628S      | 17:g.42210194G>C  | 8.97995840678191E-4  | 0.032 |
| 15     | Other             | CD8+  | <i>SIGLEC1</i> | NM_023068:exon2:c.G100T:p.G34W         | 20:g.3706656C>A   | 0.0996980518         | 0.028 |
| 15     | Other             | CD8+  | <i>GRK3</i>    | NM_005160:exon6:c.C442G:p.P148A        | 22:g.25667739C>G  | 0.0996980518         | 0.034 |
| 16     | Good syndrome     | CD4+  | <i>SENP2</i>   | NM_021627:exon15:c.C1607T:p.P536L      | 3:g.185624078C>T  | 0.0307179019         | 0.035 |
| 16     | Good syndrome     | CD8+  | <i>MEFV</i>    | NM_000243:exon10:c.1880delA:p.E627fs   | 16:g.3243607delT  | 0.512191474          | 0.242 |
| 16     | Good syndrome     | CD8+  | <i>PRKAA2</i>  | NM_006252:exon4:c.C409T:p.H137Y        | 1:g.56692436C>T   | 0.512191474          | 0.032 |
| 16     | Good syndrome     | CD8+  | <i>KRAS</i>    | NM_004985:exon3:c.C173T:p.T58I         | 12:g.25227351G>A  | 0.512191474          | 0.079 |
| 16     | Good syndrome     | CD8+  | <i>TYRO3</i>   | NM_006293:exon17:c.A2038T:p.I680F      | 15:g.41573360A>T  | 0.512191474          | 0.079 |
| 16     | Good syndrome     | CD8+  | <i>CACNA1A</i> | NM_023035:exon19:c.C2891T:p.A964V      | 19:g.13298754G>A  | 0.512191474          | 0.07  |
| 16     | Good syndrome     | CD8+  | <i>YJEFN3</i>  | NM_198537:exon6:c.G635A:p.R212H        | 19:g.19535620G>A  | 0.512191474          | 0.292 |

|      |                 |      |                 |                                         |                   |                      |       |
|------|-----------------|------|-----------------|-----------------------------------------|-------------------|----------------------|-------|
| 16   | Good syndrome   | CD8+ | <i>C5AR1</i>    | NM_001736:exon2:c.C589T:p.R197W         | 19:g.47320366C>T  | 0.512191474          | 0.13  |
| 17   | ADA2 deficiency | CD8+ | <i>TPH1</i>     | NM_004179:exon6:c.G689A:p.R230H         | 11:g.18026604C>T  | NA                   | 0.029 |
| 17   | ADA2 deficiency | CD8+ | <i>EGR1</i>     | NM_001964:exon2:c.G472A:p.V158I         | 5:g.138466921G>A  | NA                   | 0.023 |
| 17   | ADA2 deficiency | CD8+ | <i>BTBD11</i>   | NM_001018072:exon1:c.A98G:p.N33S        | 12:g.107319038A>G | NA                   | 0.03  |
| HC1  | Healthy         | CD8+ | <i>TLN1</i>     | NM_006289:exon35:c.A4631G:p.K1544R      | 9:g.35707732T>C   | 0.118211403          | 0.021 |
| HC3  | Healthy         | CD8+ | <i>INO80</i>    | NM_017553:exon17:c.C1990T:p.R664C       | 15:g.41056702G>A  | 0.24665913           | 0.068 |
| HC10 | Healthy         | CD8+ | <i>BDNF</i>     | NM_001143810:exon2:c.T141G:p.C47W       | 11:g.27674144A>C  | 0.0707740486         | 0.03  |
| HC10 | Healthy         | CD8+ | <i>NLRP13</i>   | NLRP13:NM_176810:exon5:c.C1522G:p.L508V | 19:g.55912295G>C  | 0.0707740486         | 0.031 |
| HC11 | Healthy         | CD8+ | <i>DNMT3A</i>   | NM_175629:exon19:c.T2318C:p.L773P       | 2:g.25240306A>G   | 0.110654257          | 0.043 |
| HC11 | Healthy         | CD8+ | <i>LCP2</i>     | NM_005565:exon7:c.G400C:p.E134Q         | 5:g.170270842C>G  | 0.110654257          | 0.045 |
| HC11 | Healthy         | CD8+ | <i>ABL1</i>     | NM_007313:exon9:c.T1510C:p.S504P        | 9:g.130880097T>C  | 0.110654257          | 0.059 |
| HC15 | Healthy         | CD8+ | <i>USP4</i>     | NM_003363:exon10:c.T1157C:p.F386S       | 3:g.49302514A>G   | 0.065790467          | 0.043 |
| HC15 | Healthy         | CD8+ | <i>TSLP</i>     | NM_033035:exon2:c.216+1G>A              | 5:g.111072933G>A  | 0.065790467          | 0.049 |
| HC16 | Healthy         | CD8+ | <i>POLR2H</i>   | NM_001278698:exon3:c.T173G:p.L58W       | 3:g.184365148T>G  | 0.114472464          | 0.032 |
| HC16 | Healthy         | CD8+ | <i>TLR1</i>     | NM_003263:exon4:c.A1714G:p.M572V        | 4:g.38797118T>C   | 0.114472464          | 0.021 |
| HC16 | Healthy         | CD8+ | <i>SIGLEC12</i> | NM_053003:exon1:c.C274T:p.R92X          | 19:g.51501460G>A  | 0.114472464          | 0.023 |
| HC17 | Healthy         | CD4+ | <i>MAD1L1</i>   | NM_001013836:exon15:c.1360-2A>T         | 7:g.2002123T>A    | 0.185848787          | 0.044 |
| HC17 | Healthy         | CD4+ | <i>SIGLEC8</i>  | NM_014442:exon1:c.G351C:p.R117S         | 19:g.51458037C>G  | 0.185848787          | 0.024 |
| HC17 | Healthy         | CD8+ | <i>ADRB2</i>    | NM_000024:exon1:c.T488G:p.L163R         | 5:g.148827319T>G  | 0.0644821748         | 0.057 |
| HC17 | Healthy         | CD8+ | <i>PML</i>      | NM_033247:exon5:c.C1274G:p.A425G        | 15:g.74036026C>G  | 0.0644821748         | 0.025 |
| HC17 | Healthy         | CD8+ | <i>ITGAM</i>    | NM_001145808:exon5:c.A344T:p.E115V      | 16:g.31266064A>T  | 0.0644821748         | 0.05  |
| HC17 | Healthy         | CD8+ | <i>TIAMI</i>    | NM_003253:exon6:c.G1315C:p.A439P        | 21:g.31251838C>G  | 0.0644821748         | 0.029 |
| HC17 | Healthy         | CD8+ | <i>TIAMI</i>    | NM_003253:exon5:c.A413T:p.D138V         | 21:g.31266560T>A  | 0.0644821748         | 0.047 |
| HC18 | Healthy         | CD8+ | <i>SEMA3A</i>   | NM_006080:exon9:c.925+1G>A              | 7:g.84011182C>T   | 0.136208773          | 0.037 |
| HC18 | Healthy         | CD8+ | <i>VPS13B</i>   | NM_017890:exon17:c.A2433G:p.I811M       | 8:g.99192975A>G   | 0.136208773          | 0.02  |
| HC18 | Healthy         | CD8+ | <i>CD163</i>    | NM_004244:exon4:c.C487T:p.R163C         | 12:g.7499159G>A   | 0.136208773          | 0.034 |
| HC18 | Healthy         | CD8+ | <i>ACTN1</i>    | NM_001130004:exon18:c.G2196C:p.E732D    | 14:g.68880046C>G  | 0.136208773          | 0.02  |
| HC18 | Healthy         | CD8+ | <i>NPC1</i>     | NM_000271:exon8:c.A1213G:p.T405A        | 18:g.23556356T>C  | 0.136208773          | 0.028 |
| HC20 | Healthy         | CD8+ | <i>ABCA13</i>   | NM_152701:exon50:c.C13480A:p.L4494I     | 7:g.48508005C>A   | 0.0919760615         | 0.029 |
| HC20 | Healthy         | CD8+ | <i>DMBT1</i>    | NM_001320644:exon7:c.C508T:p.R170C      | 10:g.122576623C>T | 0.0919760615         | 0.042 |
| HC20 | Healthy         | CD8+ | <i>NFRKB</i>    | NM_006165:exon22:c.A3091G:p.I1031V      | 11:g.129870009T>C | 0.0919760615         | 0.054 |
| HC21 | Healthy         | CD4+ | <i>NRAS</i>     | NM_002524:exon2:c.G38A:p.G13D           | 1:g.114716123C>T  | 8.011564664076844E-4 | 0.018 |

The table shows each mutation discovered in the paired-sample mutation analyses. The cell type harboring the mutation is shown (CD4+ or CD8+). Also, the “max clone size” -column shows the frequency of the largest T-cell clone of all of the sequenced cells (CD4+ or CD8+). The clone frequency shown always corresponds to the cell fraction in which the mutation was discovered.

**Supplementary Table S13. *STAT5B* and *KRAS* mutations in sorted T cells.**

| Patient | Gene          | AA change | Variant allele frequency |          |       |                                        |
|---------|---------------|-----------|--------------------------|----------|-------|----------------------------------------|
|         |               |           | CD3+CD4+                 | CD3+CD8+ | CD14+ | CD3 <sup>neg</sup> CD14 <sup>neg</sup> |
| Pt.2    | <i>STAT5B</i> | N418K     | 0.069                    | 0*       | 0     | 0                                      |
| Pt.13   | <i>STAT5B</i> | T628S     | 0.048                    | 0        | 0     | 0                                      |
| Pt.26   | <i>KRAS</i>   | T58I      | 0                        | 0.075    | 0     | Not sorted                             |

Flow-cytometry-mediated sorting was used to extract CD3+ T cells and other cell types for sequencing. The *STAT5B* mutations occurred only in CD3+CD4+ cells, and the *KRAS* only in CD3+CD8+ cells. \*For patient 2, CD3+CD8+ T cells were sorted also according to the largest CD3+CD8+Vbeta expansion, but both Vbeta+ and Vbeta<sup>neg</sup> fractions were negative. Abbreviations: AA, amino acid.

## Supplementary Figure S1. T-cell clones and convergence of clones.

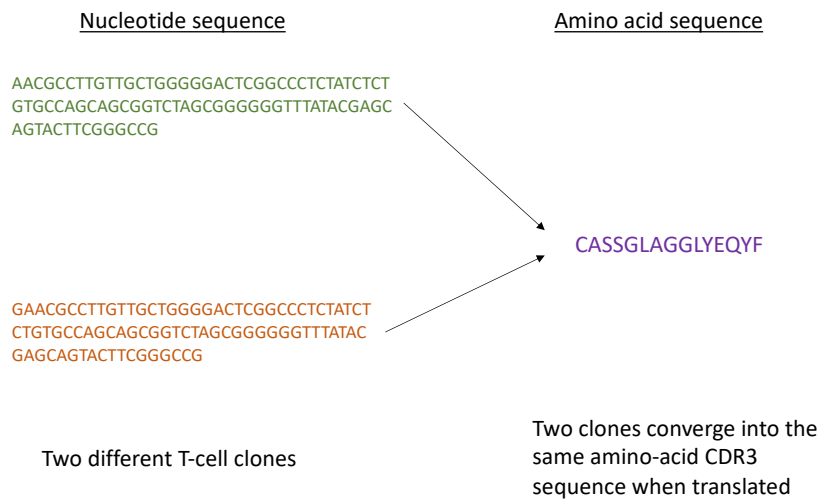

**Supplementary Figure S2. The number of discovered mutations in patients and controls.**

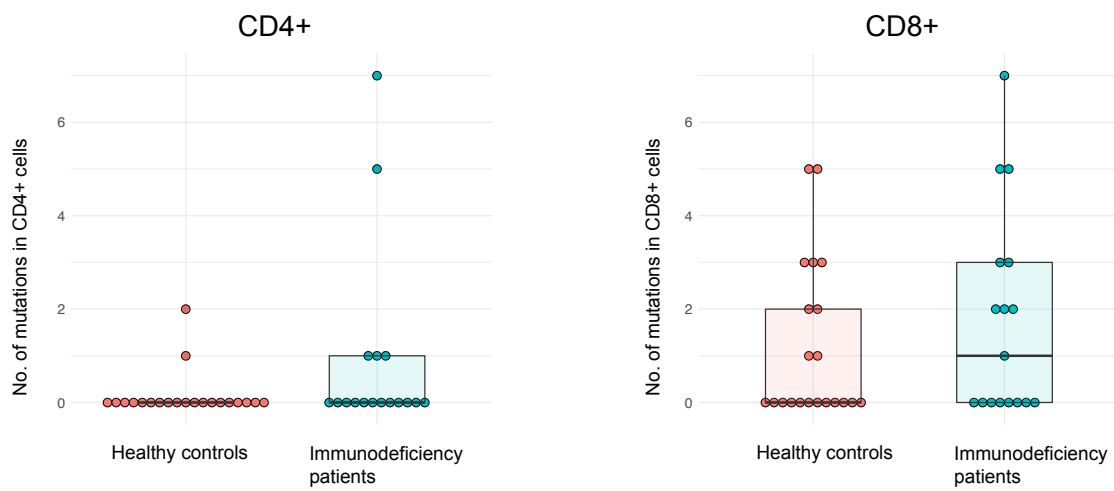

The number of somatic mutations in CD4+ or CD8+ cells did not differ between immunodeficiency patients and controls (Mann-Whitney test). The plots show the number of mutations in each studied individual, with vertical lines representing the median, box hinges interquartile ranges, and whiskers reasonable extremes of the data.

**Supplementary Figure S3. The numbers of mapped bases in CD4+ and CD8+ cells.**

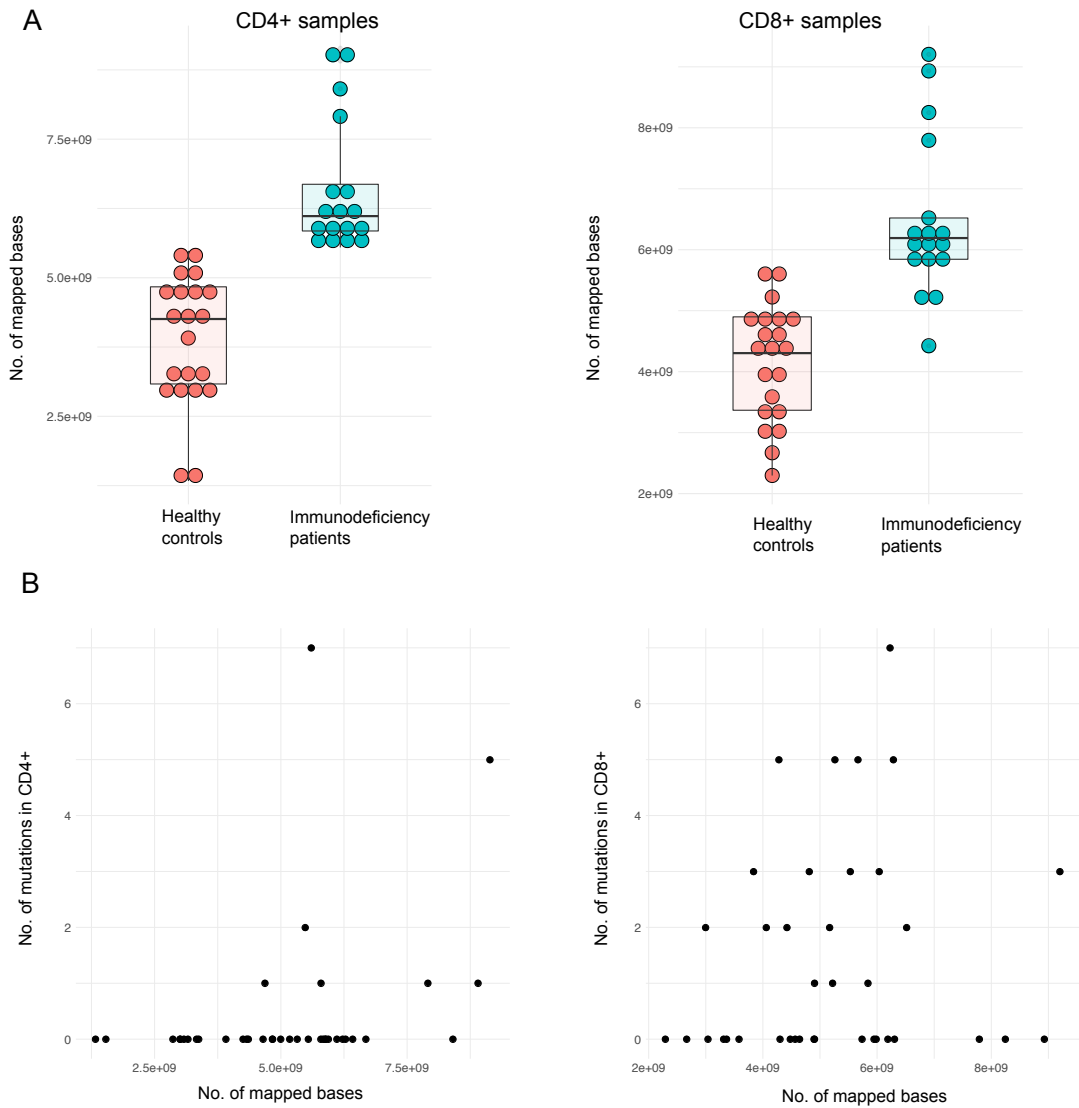

The numbers of mapped bases in immunogene sequencing for healthy controls and immunodeficiency patients. Results for CD4+ and CD8+ samples are shown separately. A. Immunodeficiency patients had higher numbers of mapped bases in CD8+ samples (p-value = 4.753e-08, Mann-Whitney test) and in CD4+ samples (p-value = 6.949e-11, Mann-Whitney test). Boxplot hinges represent interquartile medians and the vertical line the median. B. The number of mapped bases did not correlate with the number of detected mutations in CD8+ cells (Spearman correlation), although a statistically significant correlation existed in CD4+ cells (Spearman correlation p= 0.02955).

**Supplementary Figure S4. Vertical and horizontal coverage of the custom gene sequencing panel.**

**A**

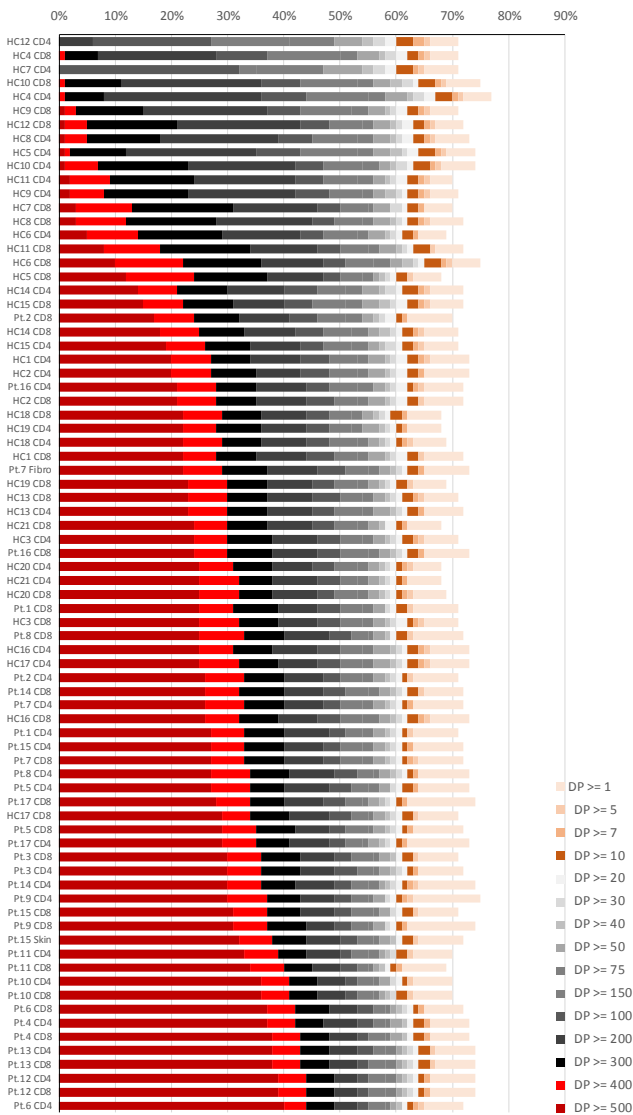

**B**

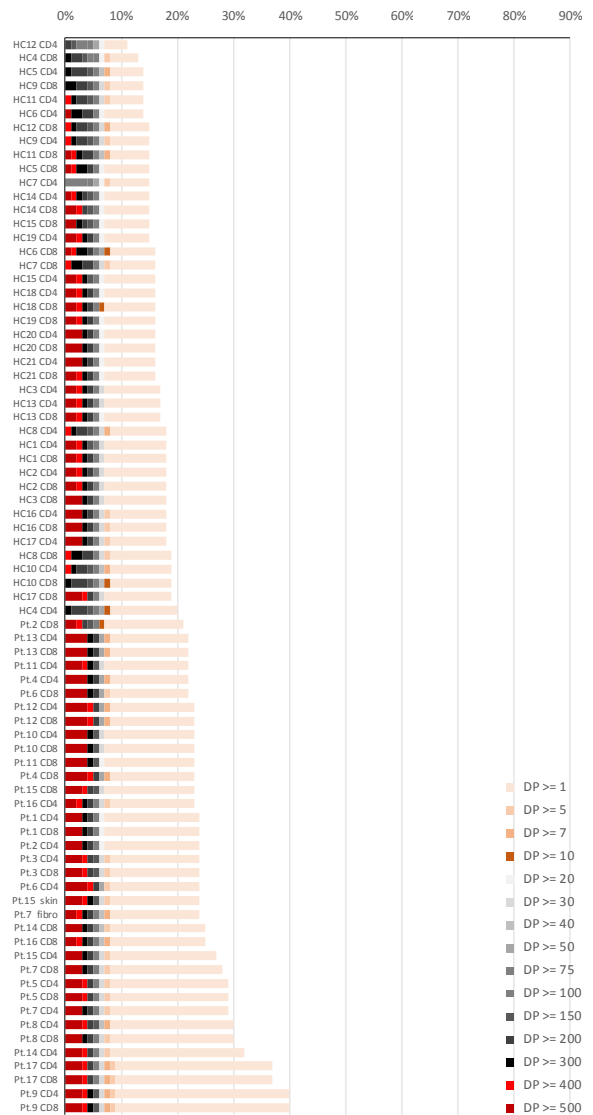

The percentage of bases covered by the given number (or more) of sequencing reads, presented as cumulative percentage. Colors show the depth. A. Coverages over the custom, targeted gene panel positions. B Coverages over all RefSeq genes. Abbreviations: DP, depth (the number of reads)



**Supplementary Figure S5. The largest clones and fraction of productive sequences in the sample.**

**A**

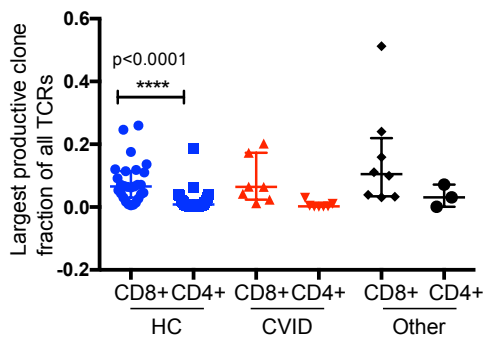

**B**

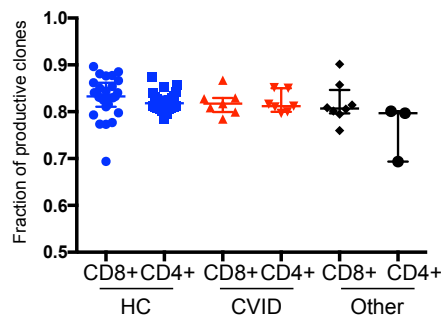

A. The largest clone (as frequency of all TCRB rearrangements in the sample) for each patient is shown. B. The fraction of productive TCRB rearrangements in the sample (frequency). Statistical tests comprised of Kruskal-Wallis test as an omnibus test and Dunn's multiple comparison tests as post-hoc tests. Statistically significant results are marked in the figure. The panels show group median, and error bars represent interquartile ranges.

### Supplementary Figure S6. Individuals with mutations have larges T-cell clones.

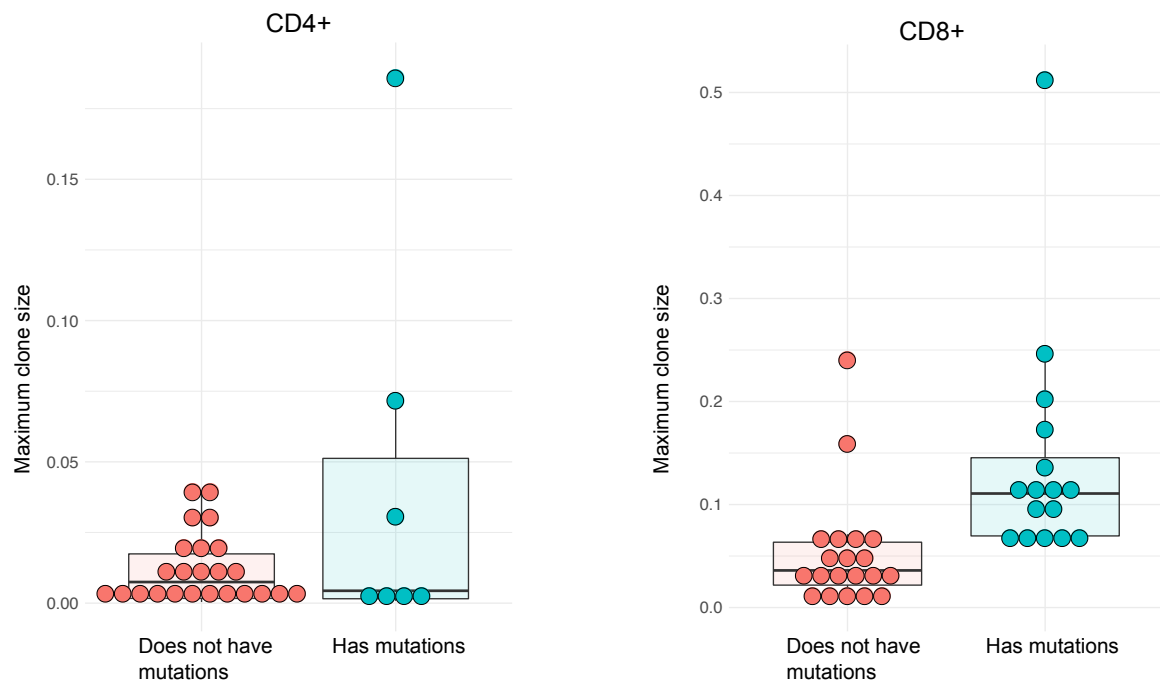

All individuals (both healthy controls and patients) were grouped using the existence of somatic mutations as a grouping factor. The sizes (frequency of all TCR rearrangements in the sample) of the largest T-cell clone in the sample were compared. In CD4+ cells, the clone sizes did not differ, but in CD8+ cells, individuals with mutations had larger T-cell clones (Mann-Whitney test  $p=4.991e-05$ ). Vertical lines in the plot represent the median, boxplot hinges interquartile ranges and whiskers reasonable extremes of the data.

**Supplementary Figure S7. CD4+ clonality correlations with B-cell subtype frequencies.**

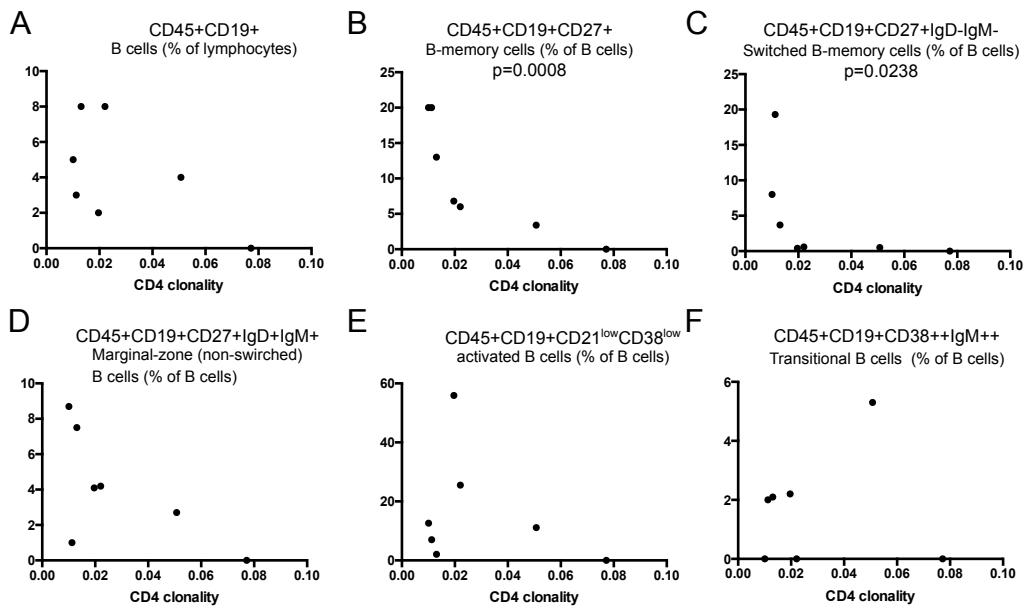

CD4+ clonality in CVID patients was plotted and correlated with the frequency of different B-cell subsets. Statistically significant correlations existed between B-memory and switched B-memory cells (Spearman correlation  $p=0.0008$  and  $p=0.0238$ ), but the associations were not linear.

### Supplementary Figure S8. V-family and J-gene usage in CVID patients and controls.

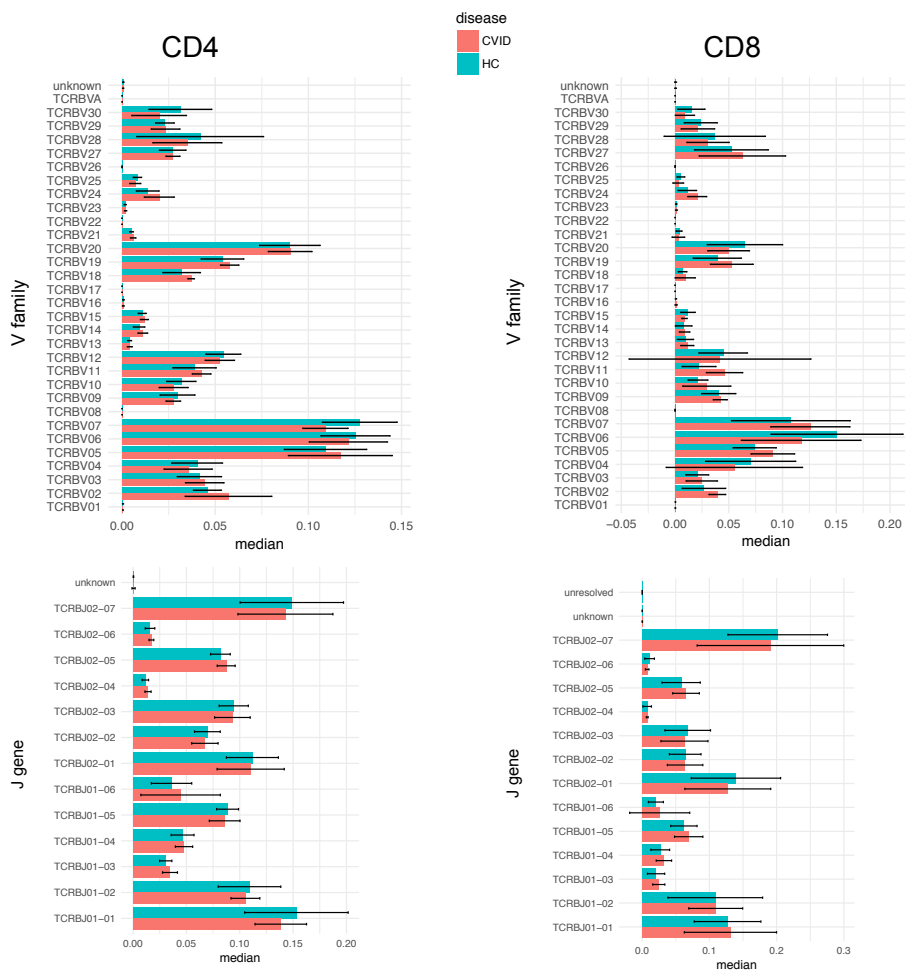

For each individual, the abundance of all TCRs that were classified to different V-families and J-genes were calculated. The graphs show the medians for CVID patients and healthy controls, and error bars represent interquartile ranges. No statistically significant differences were observed between patients and controls in neither V-family nor J-gene usage (Mann-Whitney test for each V-family and J-gene; p-values corrected for multiple comparisons with the Benjamini-Hochberg method).

**Supplementary Figure S9. CVID patients do not have more n-insertions or deletions than controls.**

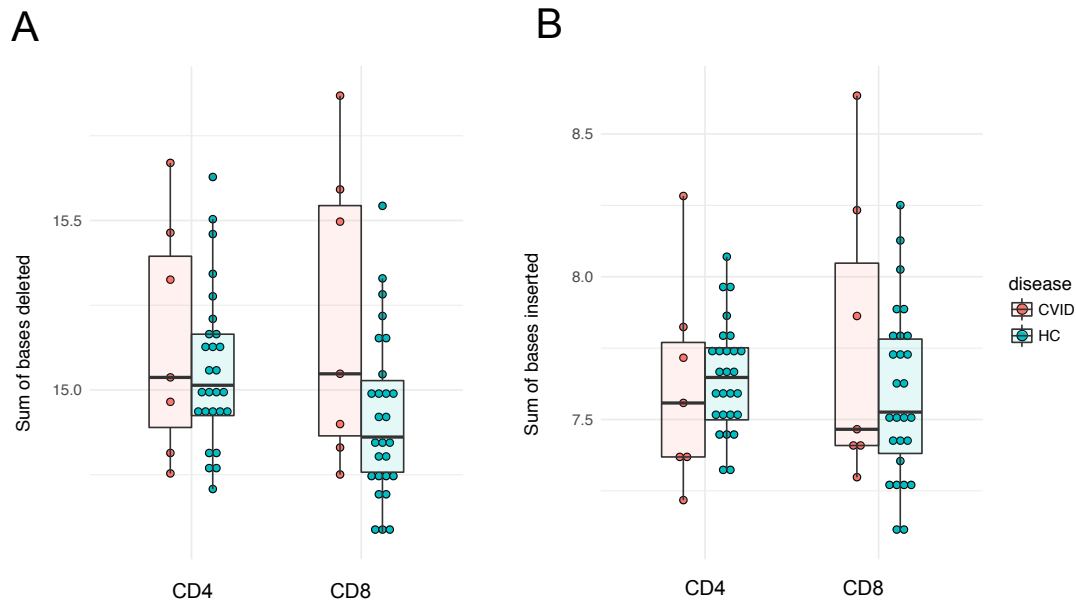

The mean number of deletions (A) and non-templated insertions (B) was calculated for each individual and compared between controls and CVID patients. No statistically significant differences (Mann-Whitney test) existed between CVID patients and healthy controls. In the figure, medians, interquartile ranges, and reasonable extremes of the data are shown. Abbreviations: HC, healthy control; CVID, common variable immunodeficiency.

**Supplementary Figure S10. All base editions in CVID and HC TCRs.**

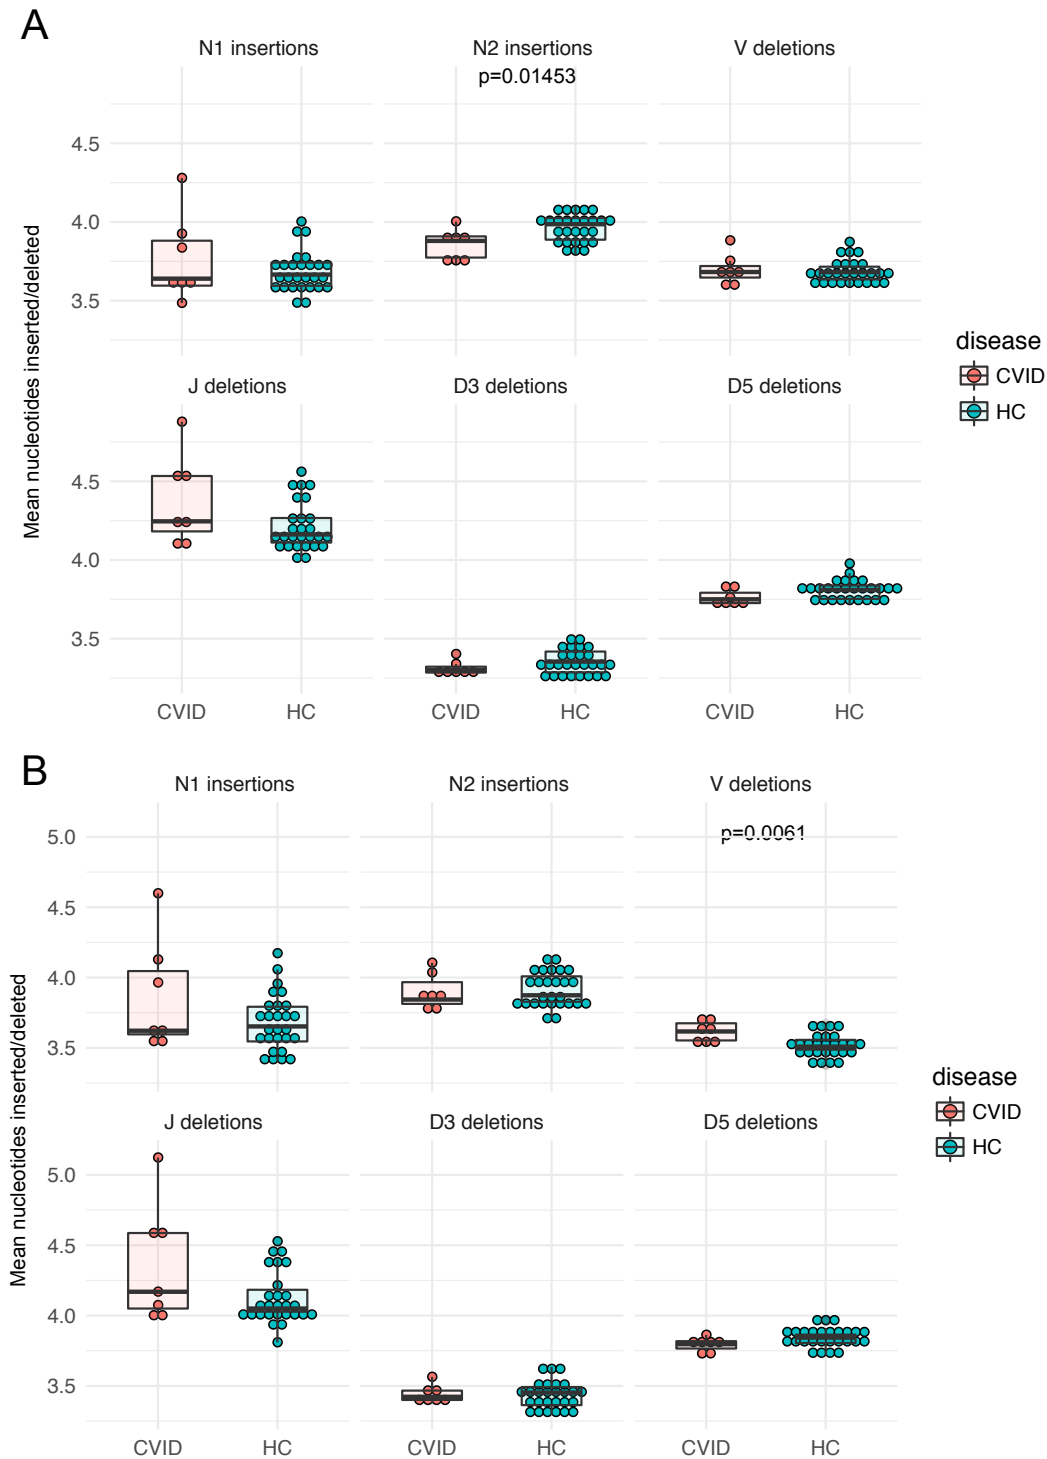

The mean number of base deletions and insertions are shown for CD4+ (A) and CD8+ cells (B). Medians, interquartile ranges, and reasonable extremes of the data are also shown. In most cases, no statistically significant differences occurred between CVID and healthy controls, but CVID CD4+ cells may have less N2 insertions and CVID CD8+ cells more V deletions than in healthy controls (Mann-Whitney test). Tests were not corrected for multiple comparisons, and thus caution in

interpretation is needed. Abbreviations: HC, healthy control; CVID, common variable immunodeficiency.

**Supplementary Figure S11. Healthy controls show higher frequencies of public, pathogen-specific TCRs in their convergent TCRs than CVID patients.**

**A. All pathogens in the McPAS database**

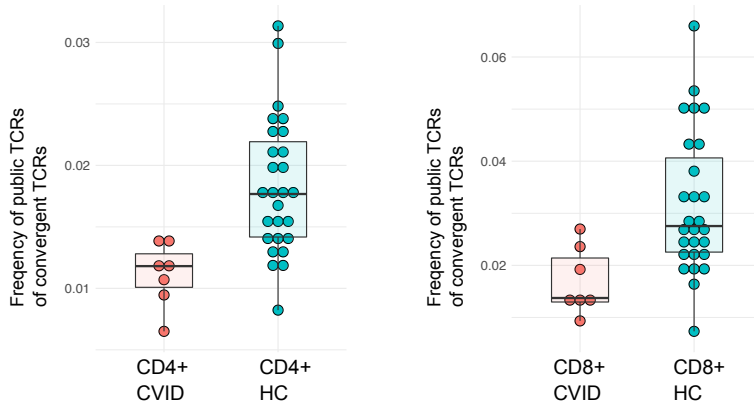

**B. CMV**

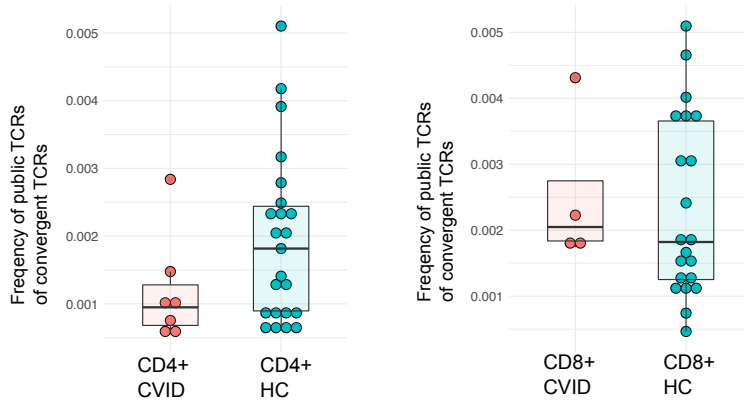

**C. EBV**

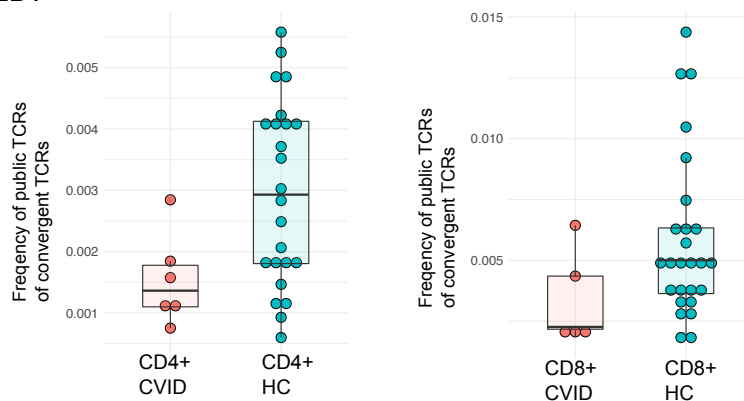

Frequency of public pathogen-specific TCRs of all convergent TCRs in both CVID patients' and healthy controls' CD4+ and CD8+ cells. Public pathogen-specific TCRs were extracted from the McPas database.<sup>10</sup> The pathogen-specific public TCRs comprised of TCRs targeting CMV, EBV, influenza, HIV, yellow fever virus, *Mycobacterium tuberculosis*, Herpes simplex 2 virus, and hepatitis C virus. Healthy controls harbored higher frequencies of public pathogen-specific TCRs in their repertoire of convergent TCRs (Mann-Whitney test  $p=0.0003454$  for CD4+;  $p=0.003182$  for CD8+) and EBV-specific CD4+ cells ( $p=0.03312$ ). The plots show median as a vertical line, and boxplot hinges represent interquartile ranges and whiskers reasonable extremes of the data.



### Supplementary Figure S12. Abundance of convergent clones.

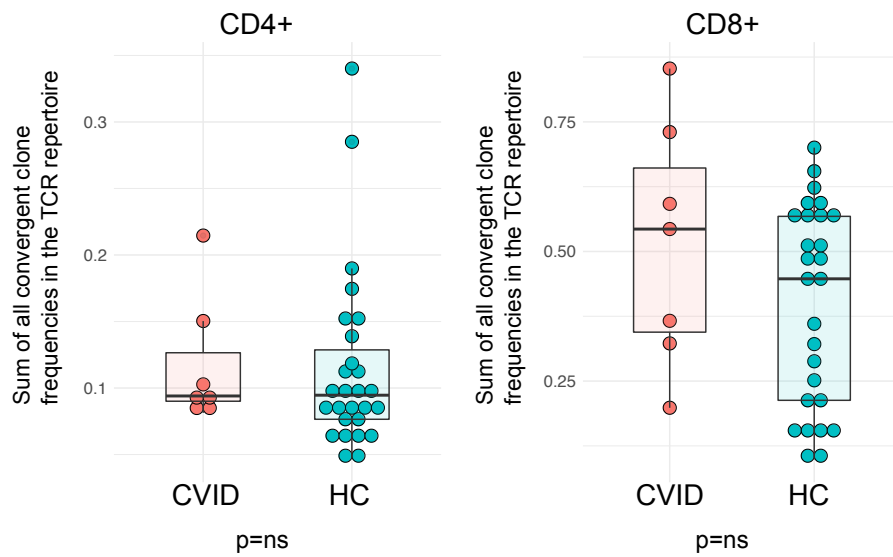

CVID patients did not show higher abundance (=sum of the frequencies of all rearrangements showing convergence) of convergent TCRs (Mann-Whitney test  $p = ns$  for CD4+ and CD8+). In the plots, vertical lines represent the median, box hinges interquartile ranges, and whiskers reasonable extremes of the data. Abbreviations: ns, not significant; HC, healthy control; CVID, common variable immunodeficiency.

**Supplementary Figure S13. VDJ gene usage mapped to CD8+ TCR clustering analysis.**

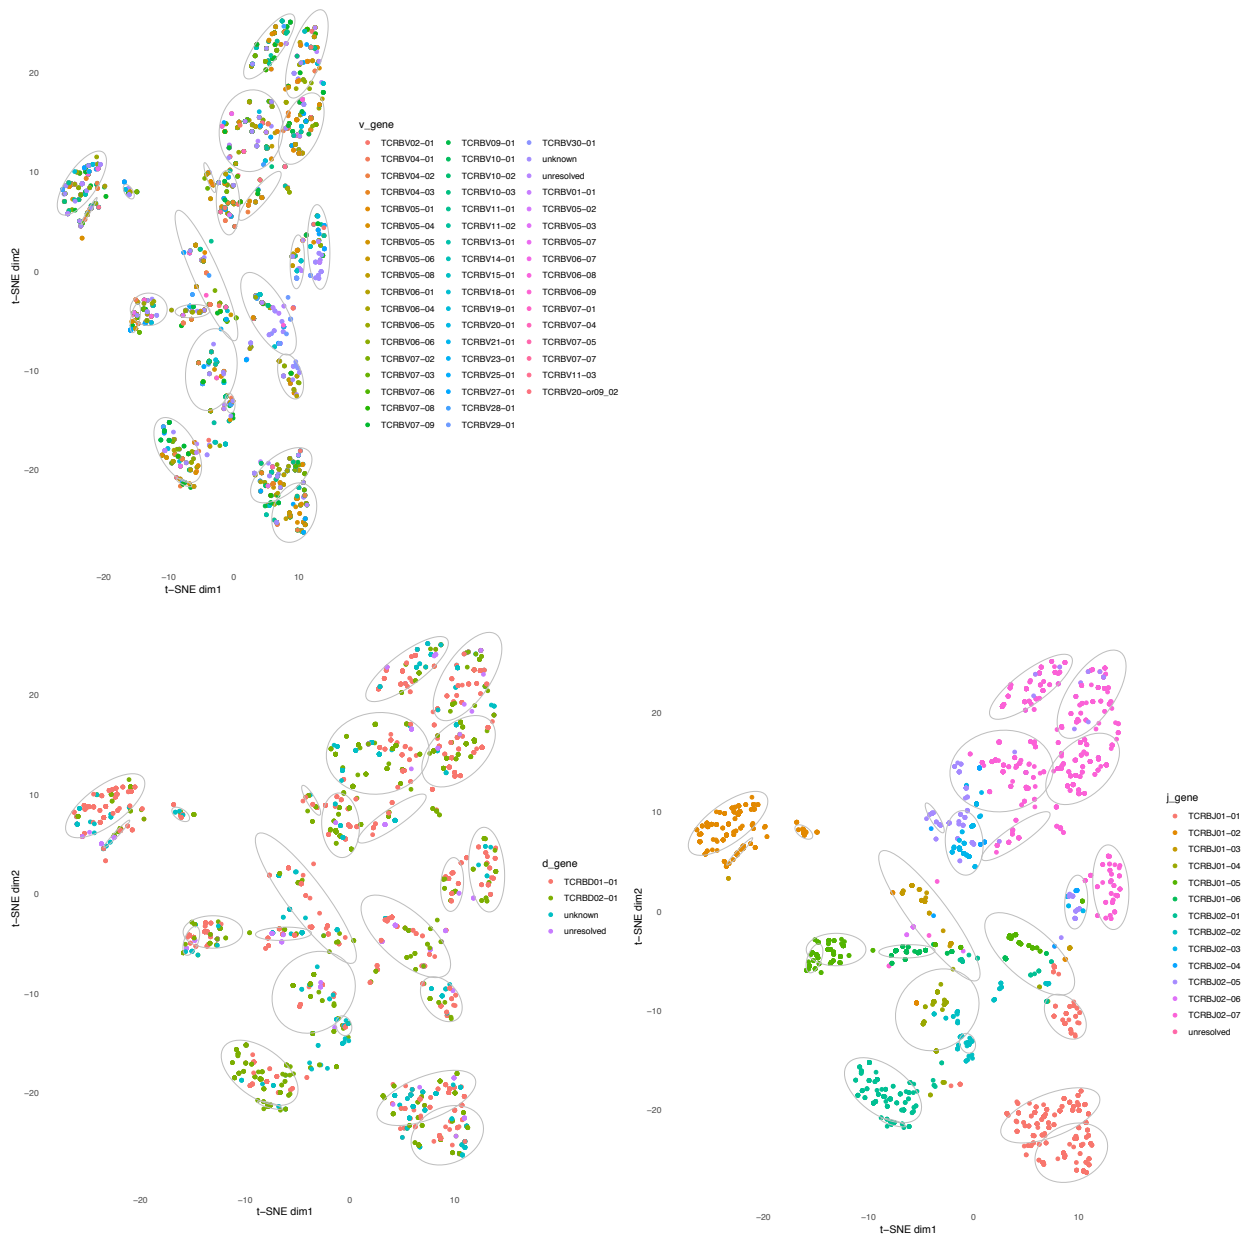

Physiochemical similarity analysis of selected CD8+ TCR CDR3 sequences by the GSKernel algorithm, presented as tSNE plots. TCRs are colored by their V-gene, D-gene, and J-genes. The V-gene does not clearly correlate with TCR similarity clusters, but the J-genes do. However, J-genes define a larger proportion of the TCR CDR3 than V- or D genes.

**Supplementary Figure S14. VDJ gene usage mapped to CD4+ TCR clustering analysis.**

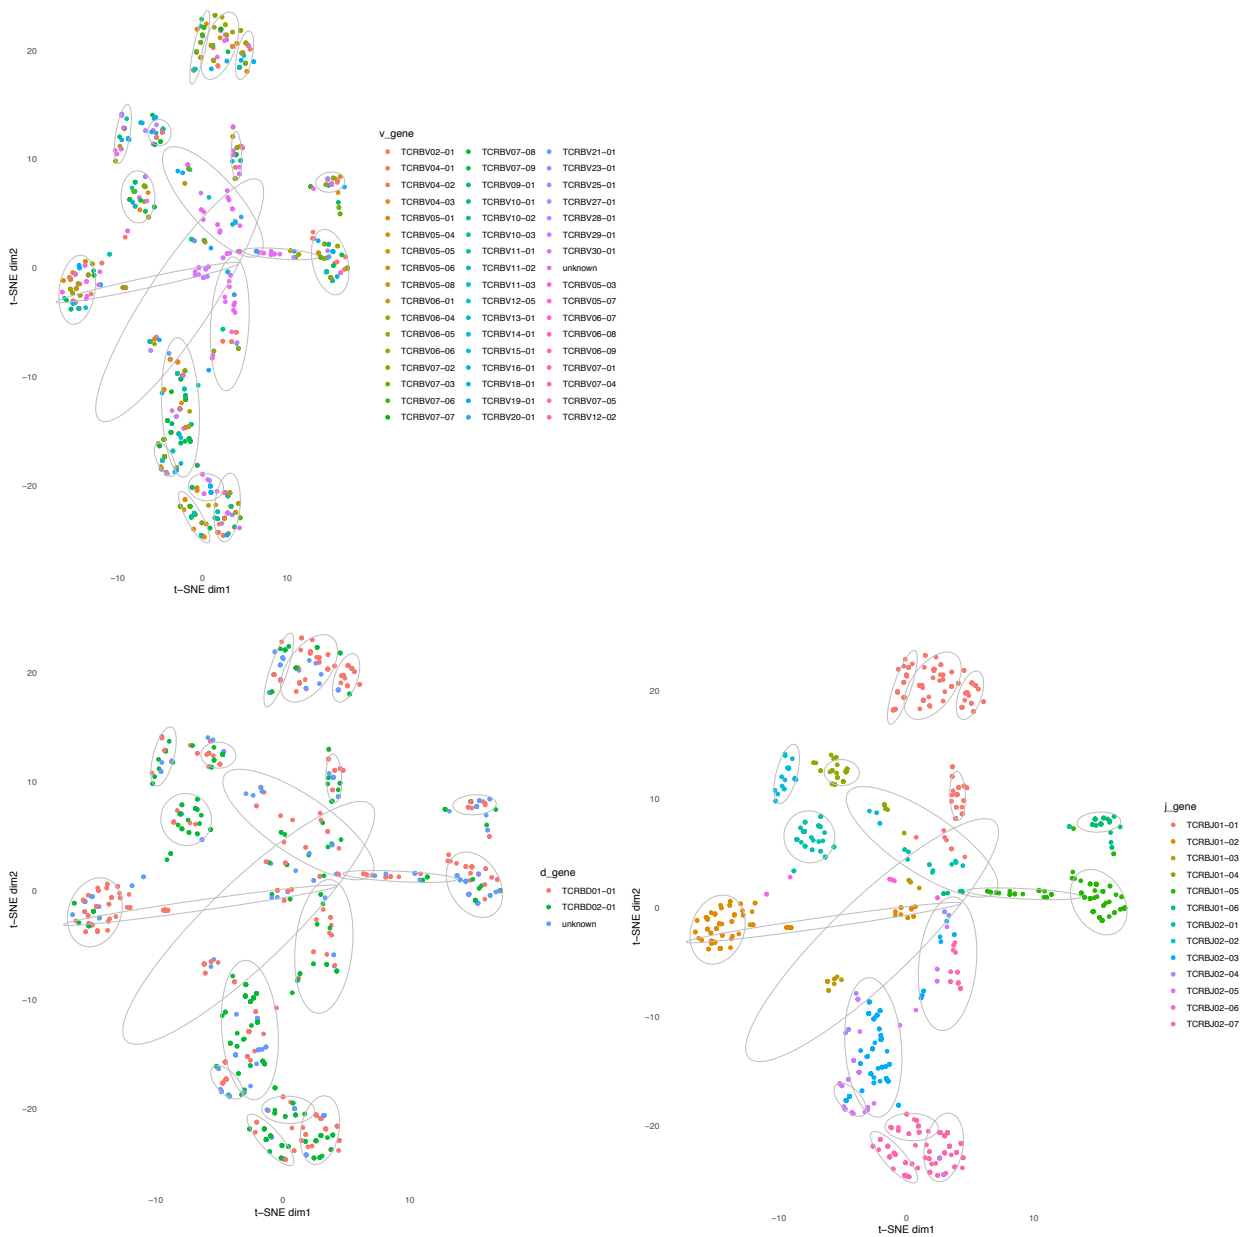

Physiochemical similarity analysis of selected CD4+ TCR CDR3 sequences by the GSKernel algorithm, presented as tSNE plots. TCRs are colored by their V-gene, D-gene, and J-genes. The V-gene does not clearly correlate with TCR similarity clusters, but the J-genes do. However, J-genes define a larger proportion of the TCR CDR3 than V- or D genes.

**Supplementary Figure S15. Pathogen-specific TCRs are more common in CD8+ cells than in CD4+ cells.**

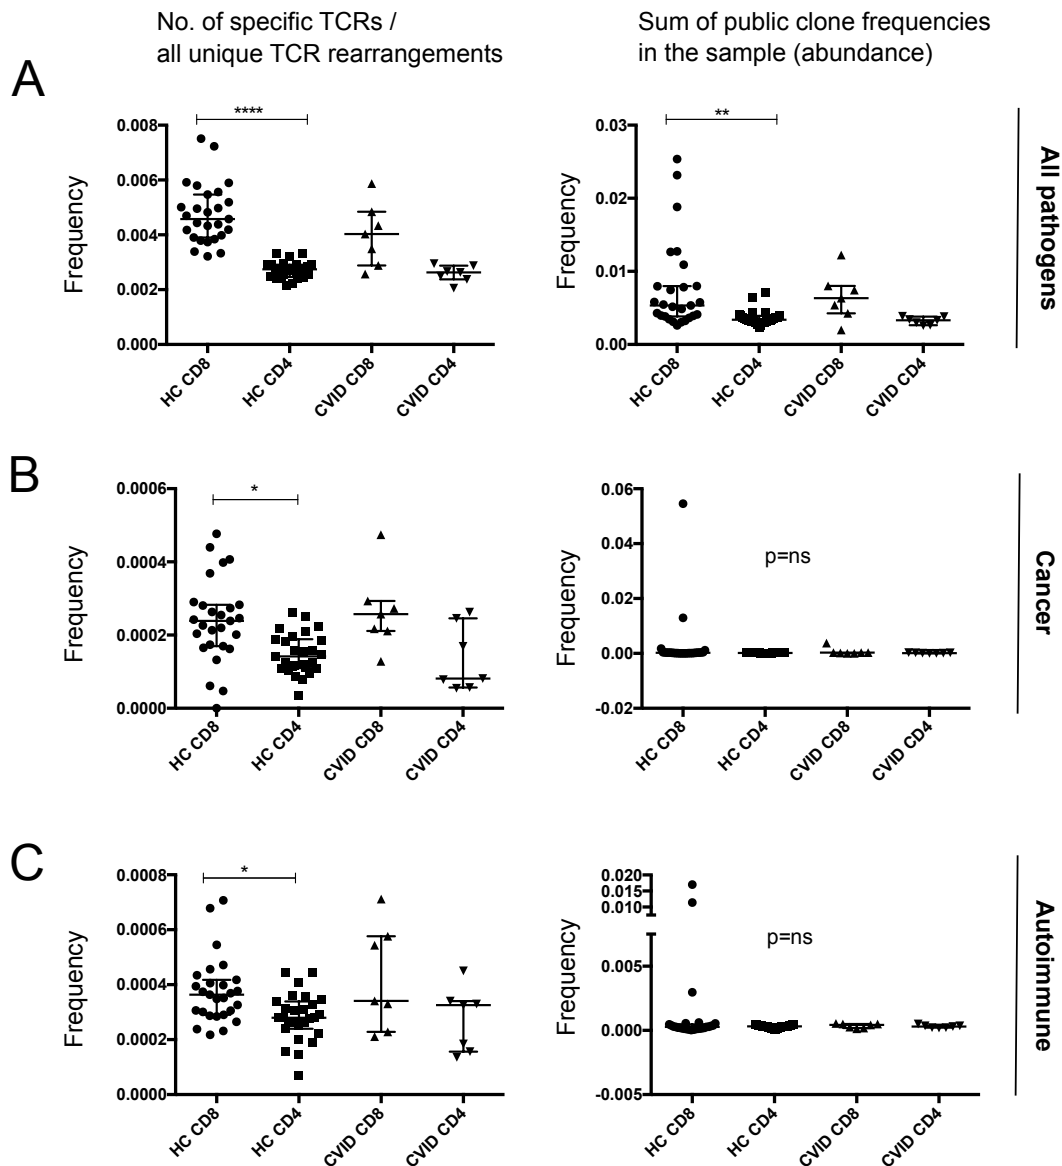

TCRB sequencing data was queried for matches for public, previously reported TCR sequences included in the McPAS database. The numbers of all pathogen-, cancer-, or autoimmune-associated TCRs were pooled for each patient and normalized for repertoire size. For pathogen- and cancer-associated TCRs, only antigen-specific TCRs were queried (labels “1” and “2” in the McPAS database), but for autoimmune TCRs, all autoimmune-associated TCRs were included in the analyses. Statistical tests comprised of Kruskal-Wallis test with Dunn’s multiple comparison tests. Panels A-C show the median and error bars represent interquartile ranges. Statistically significant results between comparisons (HC CD8+ vs HC CD4+, CVID CD8+ vs CD4+, CVID CD8+ vs HC CD8+, and CVID CD4+ vs HC CD4+) are shown. Abbreviations: ns, not significant; HC, healthy control; CVID, common variable immunodeficiency. \* $p < 0.05$ ; \*\* $p < 0.01$ ; \*\*\* $p < 0.001$ ; \*\*\*\* $p < 0.0001$ .

**Supplementary Figure S16. Virus-specific TCRs are more frequent in CD8+ cells than in CD4+ cells.**

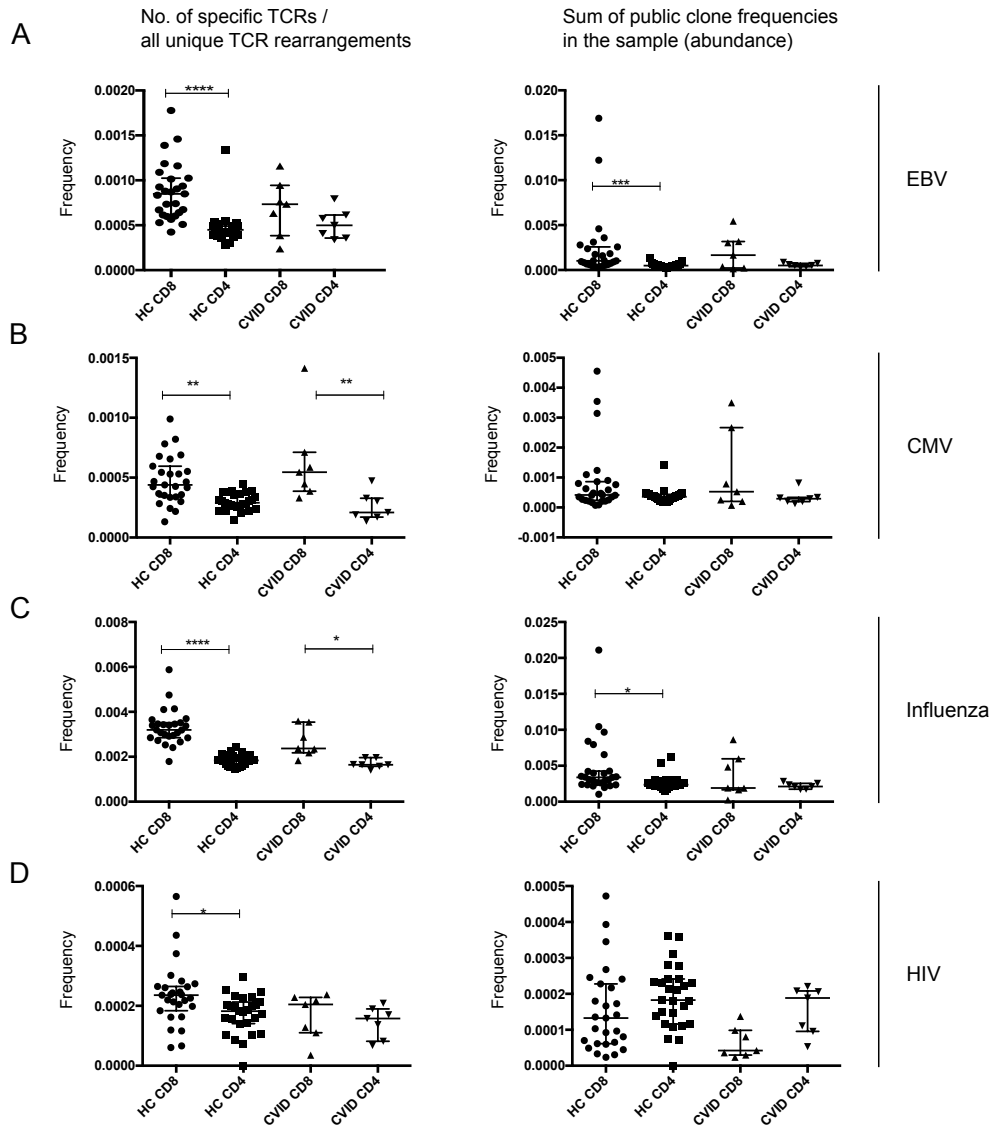

TCRB sequencing data was queried for matches for public, previously reported TCR sequences included in the McPas database. Results for CMV, EBV, influenza, and HIV are shown. Only antigen-specific TCRs were queried (labels “1” and “2” in the McPAS database). Statistical tests comprised of Kruskal-Wallis test with Dunn’s multiple comparison tests. Panels A-D show the median and error bars represent interquartile ranges. Statistically significant results between comparisons (HC CD8+ vs HC CD4+, CVID CD8+ vs CD4+, CVID CD8+ vs HC CD8+, and CVID CD4+ vs HC CD4+) are shown. Abbreviations: HC, healthy control; CVID, common variable immunodeficiency. \* $p < 0.05$ ; \*\* $p < 0.01$ ; \*\*\* $p < 0.001$ ; \*\*\*\* $p < 0.0001$ .

### Supplementary Figure S17. T-cell clone size compared to variant-allele frequencies (VAFs)

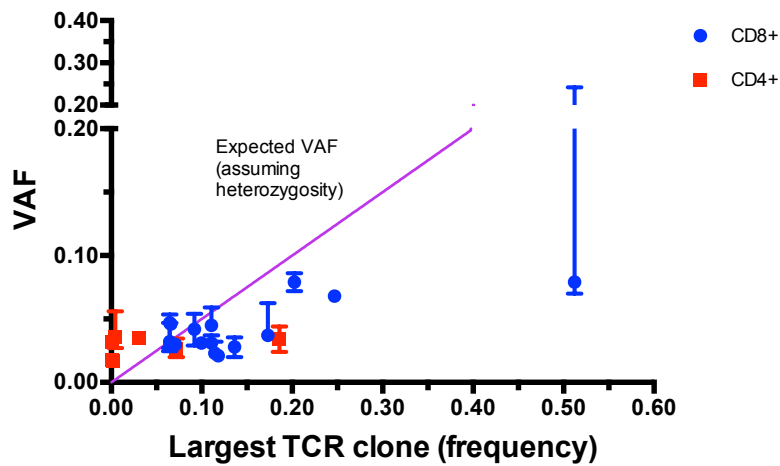

For each patient, the median VAF of somatic mutations was plotted against the frequency of the largest T-cell clone in the same cell fraction of the same patient. Results for CD4+ and CD8+ cells are shown separately. The error bars represent interquartile range of the mutation VAFs in the patient. The purple line represents expected results, if (1) all mutations were heterozygous, (2) they occurred in the largest T-cell clone, and (3) they existed in all cells of that largest clone. The results from CD8+ cells were as expected and in line with our previous results.<sup>37</sup> However, some CD4+ cells harbor mutations with large VAFs compared to clone sizes.

## References

1. Selenius JS, Martelius T, Pikkarainen S, et al. Unexpectedly high prevalence of common variable immunodeficiency in Finland. *Front Immunol* 2017;8:1190.
2. Trotta L, Martelius T, Siitonen T, et al. ADA2 deficiency: Clonal lymphoproliferation in a subset of patients. *J Allergy Clin Immunol* 2018;141(4):1534–1537.
3. Haapaniemi EM, Kaustio M, Rajala HLM, et al. Autoimmunity, hypogammaglobulinemia, lymphoproliferation, and mycobacterial disease in patients with activating mutations in STAT3. *Blood* 2015;125(4):639–649.
4. Seppänen M, Koillinen H, Mustjoki S, Tomi M, Sullivan KE. Terminal deletion of 11q with significant late-onset combined immune deficiency. *J Clin Immunol* 2014;34(1):114–118.
5. Wehr C, Kivioja T, Schmitt C, et al. The EUROclass trial : defining subgroups in common variable immunodeficiency. *Blood* 2008;111(1):77–85.
6. Warnatz K, Denz A, Dra R, et al. Severe deficiency of switched memory B cells ( CD27+1 IgM- IgD-) in subgroups of patients with common variable immunodeficiency : a new approach to classify a heterogeneous disease. *Blood* 2002;99(5):1544–1552.
7. Morgan AW, Thomson W, Martin SG, et al. Reevaluation of the interaction between HLA-DRB1 shared epitope alleles, PTPN22, and smoking in determining susceptibility to autoantibody-positive and autoantibody-negative rheumatoid arthritis in a large UK caucasian population. *Arthritis Rheum* 2009;60(9):2565–2576.
8. Carlson CS, Emerson RO, Sherwood AM, et al. Using synthetic templates to design an unbiased multiplex PCR assay. *Nat Commun* 2013;4:2680.
9. Robins HS, Campregher P V, Srivastava SK, et al. Comprehensive assessment of T-cell receptor beta-chain diversity in alphabeta T cells. *Blood* 2009;114(19):4099–4107.
10. Tickotsky N, Sagiv T, Prilusky J, Shifrut E, Friedman N. McPAS-TCR: A manually curated catalogue of pathology-associated T cell receptor sequences. *Bioinformatics* 2017;33(18):2924–2929.
11. Giguère S, Marchand M, Laviolette F, Drouin A, Corbeil J. Learning a peptide-protein binding affinity predictor with kernel ridge regression. *BMC Bioinformatics* 2013;14(1):82.
12. Levine JH, Simonds EF, Bendall SC, et al. Data-Driven Phenotypic Dissection of AML Reveals Progenitor-like Cells that Correlate with Prognosis. *Cell* 2015;162(1):184–197.
13. Van Der Maaten LJP, Hinton GE. Visualizing high-dimensional data using t-SNE. *J Mach Learn Res* 2008;(9):2579–2605.
14. Cruciani G, Baroni M, Carosati E, Clementi M, Valigi R, Clementi S. Peptide studies by means of principal properties of amino acids derived from MIF descriptors. *J Chemom* 2004;18(34):146–155.
15. Breuer K, Foroushani AK, Laird MR, et al. InnateDB: Systems biology of innate immunity and beyond - Recent updates and continuing curation. *Nucleic Acids Res* 2013;41(Database issue):D1228–D1233.
16. Lynn DJ, Chan C, Naseer M, et al. Curating the innate immunity interactome. *BMC Syst Biol* 2010;4:117.
17. Lynn DJ, Winsor GL, Chan C, et al. InnateDB: Facilitating systems-level analyses of the mammalian innate immune response. *Mol Syst Biol* 2008;4:218.
18. Dufva O, Kankainen M, Kelkka T, et al. Aggressive natural killer-cell leukemia mutational landscape and drug profiling highlight JAK-STAT signaling as therapeutic target. *Nat Commun* 2018;9:1567.
19. Bolger AM, Lohse M, Usadel B. Trimmomatic: a flexible trimmer for Illumina sequence data. *Bioinformatics* 2014;30(15):2114–2120.
20. Li H. Aligning sequence reads, clone sequences and assembly contigs with BWA-MEM. Prepr [Epub ahead of print].
21. McKenna A, Hanna M, Banks E, et al. The Genome Analysis Toolkit: a MapReduce

- framework for analyzing next-generation DNA sequencing data. *Genome Res* 2010;20(9):1297–1303.
22. Cibulskis K, Lawrence MS, Carter SL, et al. Sensitive detection of somatic point mutations in impure and heterogeneous cancer samples. *Nature biotechnology* 2013;31(3):213–219.
  23. Zhao H, Sun Z, Wang J, Huang H, Kocher J-P, Wang L. CrossMap: a versatile tool for coordinate conversion between genome assemblies. *Bioinformatics* 2014;30(7):1006–1007.
  24. Wang K, Li M, Hakonarson H. ANNOVAR: functional annotation of genetic variants from high-throughput sequencing data. *Nucleic Acids Res* 2010;38(16):e164.
  25. Jaiswal S, Fontanillas P, Flannick J, et al. Age-related clonal hematopoiesis associated with adverse outcomes. *N Engl J Med* 2014;371(26):2488–98.
  26. Jaiswal S, Natarajan P, Silver AJ, et al. Clonal Hematopoiesis and Risk of Atherosclerotic Cardiovascular Disease. *N Engl J Med* 2017;377(2):111–121.
  27. Genovese G, Kähler AK, Handsaker RE, et al. Clonal Hematopoiesis and Blood-Cancer Risk Inferred from Blood DNA Sequence. *N Engl J Med* 2014;371(26):2477–2487.
  28. Fabregat A, Jupe S, Matthews L, et al. The Reactome Pathway Knowledgebase. *Nucleic Acids Res* 2018;46(D1):D649–D655.
  29. Ashburner M, Ball CA, Blake JA, et al. Gene ontology: tool for the unification of biology. The Gene Ontology Consortium. *Nat Genet* 2000;25(1):25–29.
  30. Expansion of the Gene Ontology knowledgebase and resources. *Nucleic Acids Res* 2017;45(D1):D331–D338.
  31. Rosenthal R, McGranahan N, Herrero J, Taylor BS, Swanton C. deconstructSigs: delineating mutational processes in single tumors distinguishes DNA repair deficiencies and patterns of carcinoma evolution. *Genome Biol* 2016;17(1):31.
  32. Alexandrov LB, Nik-Zainal S, Wedge DC, et al. Signatures of mutational processes in human cancer. *Nature* 2013;500(7463):415–421.
  33. Savola P, Lundgren S, Keränen MAI, et al. Clonal hematopoiesis in patients with rheumatoid arthritis. *Blood Cancer J* 2018;8(8):69.
  34. Dobin A, Davis CA, Schlesinger F, et al. STAR: ultrafast universal RNA-seq aligner. *Bioinformatics* 2013;29(1):15–21.
  35. Liao Y, Smyth GK, Shi W. The Subread aligner: fast, accurate and scalable read mapping by seed-and-vote. *Nucleic Acids Res* 2013;41(10):e108.
  36. Robinson MD, McCarthy DJ, Smyth GK. edgeR: a Bioconductor package for differential expression analysis of digital gene expression data. *Bioinformatics* 2010;26(1):139–140.
  37. Savola P, Kelkka T, Rajala HLM, et al. Somatic mutations in clonally expanded cytotoxic T lymphocytes in patients with newly diagnosed rheumatoid arthritis. *Nat Commun* 2017;8:15869.
